# Supplementary material
Source: publisher figshare collection journal article supplement (https://acs.figshare.com/ndownloader/files/4696216)

**Influence of the bond fixation in benzo annulated *N*-salicylideneanilines and their *ortho*-COX derivatives (X=CH3, NH2, OCH3) on tautomeric equilibria in solution**

Ryszard Gawi`necki,a Agnieszka Kuczek,a Erkki Kolehmainen,c Borys Osmialowski, a Tadeusz M. Krygowski,b and Reijo Kauppinenc

aDepartment of Chemistry, Technical and Agricultural University, Seminaryjna 3, 85‑326 Bydgoszcz, Poland

bDepartment of Chemistry, Warsaw University, Pasteura 1, 02-093 Warsaw, Poland

c Department of Chemistry, P.O. Box 35, FIN-40014, University of Jyväskylä, Finland

gawiner@utp.edu.pl

**Supporting Information**

Supporting Information contains coordinates of optimized structures (page S1) and NMR spectra of new compounds (page S30).

Cartesian coordinates for structures optimized at B3LYP/6-31G(2d,p) level.

Structure / cartesians [A]

1F

C 0.069022964 -0.3884889571 0.0208933806

C 0.0954654942 -0.3206752762 1.4027161984

C 1.2859039521 0.0498427913 2.043148817

C 2.4284703238 0.3460191878 1.3153436382

C 2.4104940297 0.2801005095 -0.0840294516

C 1.2095855006 -0.0918662222 -0.7474919433

C 1.148375827 -0.1703873181 -2.1907014834

N 2.1685939983 0.0804830904 -2.9397781903

C 2.068199422 0.0468213237 -4.342207874

C 3.1876935681 -0.3839554074 -5.0668655153

C 3.1488579556 -0.4392335139 -6.4552757986

C 2.0020708897 -0.0424145951 -7.1434801588

C 0.8954168814 0.4148334615 -6.4297812727

C 0.9236905668 0.4622293863 -5.0390216937

O 3.5276149865 0.5681907705 -0.757871351

H 4.0743008439 -0.6865954633 -4.5202877863

H -0.8432756664 -0.6731435704 -0.4966051558

H -0.7911397118 -0.5507201396 1.9822590161

H 1.3184956698 0.1062561682 3.1268436761

H 3.3538860313 0.6321295042 1.8021381614

H 0.1872060669 -0.4711167136 -2.6254021835

H 4.019394386 -0.7865177495 -7.0023256065

H 1.9768326844 -0.0744168473 -8.2275092446

H 0.0076393424 0.7480531968 -6.9579069476

H 0.0733836384 0.8553026401 -4.4920228868

H 3.3177394051 0.4577452936 -1.7255621982

1E

C -0.0515408718 -0.0003258901 0.1207421714

C 0.0801788462 0.0005837112 1.4803111648

C 1.3858691956 0.0015859586 2.0543895539

C 2.5164062632 0.0016391239 1.2854952056

C 2.4449343084 0.0010440452 -0.154027118

C 1.0944660083 -0.000345355 -0.7288723153

C 0.9390397672 -0.0016971312 -2.1158434447

N 1.9832955446 -0.0016036841 -2.9381378746

C 1.9935693126 -0.0024778312 -4.3394858687

C 3.2442222189 -0.0027316141 -4.9717896133

C 3.3283227826 -0.0036015972 -6.3588988551

C 2.1706569592 -0.0042316332 -7.1353830719

C 0.9262305787 -0.0039698011 -6.506325161

C 0.8294134175 -0.0030910713 -5.1188299616

O 3.4795303527 0.0004780798 -0.8758355419

H 4.1438192088 -0.0022639783 -4.3647445199

H -1.0368616583 -0.0010017244 -0.339865506

H -0.7924940863 0.000613896 2.1232023675

H 1.4787717505 0.0024271607 3.1372494905

H 3.5076725363 0.0021213925 1.7254108477

H -0.0586276747 -0.0027229131 -2.5469773744

H 4.3043232215 -0.0037929063 -6.832721987

H 2.2359724585 -0.0049131025 -8.217766387

H 0.0177858773 -0.0044336164 -7.0998433947

H -0.1500934322 -0.0028499822 -4.6553909893

H 2.8781171147 -0.0007395362 -2.3809718171

2F

C 0.0084299113 0.0046138255 0.010484996

C 0.0282147024 0.0277227181 1.4402710923

C 1.279588552 -0.0034421502 2.1175662674

C 2.4618071382 -0.0520598614 1.4369469656

C 2.4703226755 -0.0775117312 0.0187678952

C 1.2606458279 -0.0562737148 -0.7076581979

C 1.3095341604 -0.1017453917 -2.1495593781

N 2.4265869185 -0.1352778915 -2.8056382708

C 2.4434336471 -0.2436981935 -4.2065588679

C 3.4811433943 0.3946195809 -4.8999081761

C 3.5507800092 0.3228173004 -6.2862677091

C 2.599985428 -0.4049959739 -7.0023555491

C 1.5816718334 -1.0657448522 -6.3171982959

C 1.5009347579 -0.9909127388 -4.9297340184

O 3.6590845384 -0.1213357785 -0.5741271035

H 3.4871997682 -0.1256639621 -1.5669124465

H 4.215108957 0.9566469042 -4.3324982572

C -1.2606110076 0.0446945366 -0.6209159961

C -1.1852403446 0.0830152787 2.1650434077

H 1.2788906304 0.0149018692 3.2037723893

H 3.4187395482 -0.0729207781 1.9456206531

H 0.3655159728 -0.0964825725 -2.6982881313

H 4.3536219517 0.8323144045 -6.8093846985

H 2.6616225621 -0.4696573947 -8.0834578059

H 0.8518531099 -1.6546150707 -6.8638112344

H 0.7303030418 -1.5418326038 -4.4010396398

C -2.4276035959 0.0991390288 0.1109391723

C -2.3986383413 0.1177631377 1.5185552767

H -1.1373863821 0.098543535 3.2501392779

H -3.3239359982 0.1605527843 2.0828634617

H -3.3805707445 0.1293189934 -0.4078827753

H -1.3330426571 0.037503872 -1.7016054247

2E

C -0.044162804 -0.0317840039 0.0291312543

C 0.0297813052 0.046066582 1.4477689651

C 1.3179853916 0.1316899027 2.0853734219

C 2.4764751896 0.1457332778 1.3871794362

C 2.4911754999 0.0715561991 -0.062493475

C 1.1968987192 -0.0284118163 -0.7419323138

C 1.1878015962 -0.1197425956 -2.1295009164

N 2.29839979 -0.1094154507 -2.8705686136

C 2.4000816913 -0.2251019015 -4.2632286295

C 3.6282272836 0.1020158903 -4.8540046778

C 3.7905069108 0.0077934418 -6.2308882805

C 2.7344689996 -0.4102348943 -7.039612458

C 1.5155137167 -0.7440532416 -6.4516524851

C 1.3435384933 -0.6611044062 -5.073563023

O 3.5836547102 0.0948307995 -0.6810148681

H 3.1457291193 -0.0034315122 -2.2717544928

H 4.4458262849 0.4377643578 -4.2242035011

C -1.3289998386 -0.1086507263 -0.5472530439

C -1.1463963787 0.0405694164 2.2200314267

H 1.3367841343 0.1886108396 3.1712641368

H 3.4432650091 0.2137108049 1.8736328041

H 0.2515333721 -0.1910384255 -2.670327877

H 4.7472510401 0.266212214 -6.6726289107

H 2.8616728656 -0.4820796385 -8.1140957073

H 0.6899486237 -1.0847071149 -7.0680947346

H 0.3979848669 -0.9590576848 -4.6357474373

C -2.4749340675 -0.1125384768 0.23026869

C -2.3920604271 -0.0381434119 1.6266286138

H -1.0561205601 0.1004697058 3.301005691

H -3.2923195201 -0.0412138067 2.2314455537

H -3.4453580192 -0.1727840033 -0.2523387169

H -1.4446264576 -0.1643044383 -1.6238655686

3F

C 0.0123175713 -0.0588946669 -0.0030491711

C 0.0070130883 -0.0372082375 1.4044474655

C 1.2656264813 0.0668629862 2.0858404432

C 2.4594678648 0.1430031743 1.3355362409

C 2.4451626424 0.118966293 -0.0445376497

C 1.1870220099 0.0143280684 -0.7374092679

C 1.121735507 -0.0131788557 -2.1856101311

N 2.1728409638 0.0596204712 -2.9269514713

C 2.08250149 -0.0183246807 -4.3284650565

C 2.9988772043 0.7269568771 -5.0824222908

C 2.9596843221 0.6916551284 -6.4714510568

C 2.0238691673 -0.1074470607 -7.1286349658

C 1.1291631452 -0.8743616601 -6.3838600371

C 1.1546385218 -0.8341258666 -4.9928953591

O 3.6010677169 0.1956878856 -0.7189110747

H 3.3786115235 0.1713836102 -1.6853020498

H 3.7242283001 1.3402177533 -4.5589041115

H -0.9346698142 -0.1366663197 -0.5320230203

C -1.1921528442 -0.1131613307 2.1625251933

C 1.2604188389 0.0903663611 3.5066876072

H 3.416164841 0.2227341685 1.8407231554

H 0.1195392806 -0.083937319 -2.6259100619

H 3.6672112681 1.2836427 -7.0429161519

H 2.0025780419 -0.1442695725 -8.2126007427

H 0.4137689842 -1.5169325256 -6.8871567654

H 0.4815373712 -1.4620288407 -4.4189692409

C -1.1593707406 -0.0875195939 3.5339873071

C 0.0824178599 0.0154552183 4.2089978208

H -2.1377682218 -0.1915293146 1.6335106404

H -2.0794429616 -0.1456249984 4.1057469456

H 0.098957437 0.0349849658 5.2942239119

H 2.2087467192 0.1689822392 4.0296045698

3E

see text

4F

C -0.0185706955 -0.1198614731 0.0336820066

C 0.003168308 -0.0746814998 1.3979530573

C 1.245343065 -0.0039317413 2.0942098047

C 2.4679904737 0.0203845297 1.3581231162

C 2.4195831895 -0.0294931171 -0.0703641357

C 1.1815200663 -0.1012138119 -0.7341518405

C 1.1218888576 -0.1524123181 -2.1739937932

N 2.1849022408 -0.1287164543 -2.9110860102

C 2.1091569025 -0.2349205071 -4.3103589087

C 3.0753594942 0.4389837247 -5.0699402567

C 3.0537066744 0.3712617612 -6.4581607222

C 2.0818657606 -0.3873897993 -7.1108382204

C 1.1344797568 -1.0825588525 -6.3607115613

C 1.1451334572 -1.011978869 -4.9708896915

O 3.5705797917 -0.0029120378 -0.7374282418

H 3.3380978055 -0.0367013474 -1.7147890884

H 3.8270102376 1.0243950583 -4.5514689367

H -0.9648315023 -0.1733807658 -0.4979144816

H -0.9190543266 -0.091336612 1.9692442042

C 1.3127454133 0.0448342684 3.5073437768

C 3.7015364869 0.092714912 2.0478108922

H 0.1237925642 -0.197286746 -2.6255965711

H 3.8020379601 0.9079381006 -7.0324263377

H 2.0723849849 -0.4485359586 -8.1938594358

H 0.3888836385 -1.6942112741 -6.8588388059

H 0.429183277 -1.587076097 -4.393384728

C 2.5246999065 0.1145173451 4.1571999163

C 3.7300305935 0.138890554 3.4229507967

H 4.6167548018 0.1104531853 1.4685613954

H 4.6788768789 0.1941192357 3.9462122406

H 0.386074917 0.0265787163 4.0732463943

H 2.5557864428 0.151294996 5.2416154695

4E

C -0.0758868599 -0.1442628878 0.0711133593

C -0.0126944378 -0.0981086076 1.4234262988

C 1.2586555363 -0.0159473102 2.0998578213

C 2.4612760108 0.0187727326 1.3482410411

C 2.4271692087 -0.0290586174 -0.1211570406

C 1.1076410605 -0.1154040255 -0.7460445525

C 0.9967726232 -0.1652894205 -2.1291169664

N 2.0517648656 -0.1381404693 -2.949004011

C 2.0653476848 -0.1955611082 -4.3483298123

C 3.2929212175 0.0106089508 -4.9928410917

C 3.3730367036 -0.0332368834 -6.3793294957

C 2.2347058157 -0.281106081 -7.1451061047

C 1.0147564799 -0.4910916528 -6.5042644058

C 0.9225312216 -0.4541903274 -5.1166880557

O 3.482998195 0.0050449848 -0.7933259301

H 2.9380646071 -0.062721481 -2.4155128853

H 4.1776508148 0.2097199466 -4.3963676524

H -1.0390457486 -0.2062625442 -0.4299625059

H -0.9170918922 -0.12238469 2.0226392684

C 1.3459691695 0.0321486128 3.5049588764

C 3.6980675042 0.0995478498 2.006975758

H 0.0112991853 -0.2199375375 -2.5823477225

H 4.3311290642 0.1294455809 -6.861856605

H 2.2976135289 -0.3143760774 -8.2270911436

H 0.1223074503 -0.6930518758 -7.08766304

H -0.0341164448 -0.6408525695 -4.6431653503

C 2.5742129424 0.1115678107 4.1387931845

C 3.7597478489 0.1457346555 3.3888217506

H 4.5943903069 0.12400247 1.3978206655

H 4.7191662402 0.2079628457 3.8917216935

H 0.4305928738 0.0060703143 4.0890096918

H 2.6195473441 0.1476660428 5.2229562789

5F

C -0.0630333332 -0.1338559123 -0.0142386671

C -0.0523760569 -0.0775211815 1.409846957

C 1.2177562547 0.0455152819 2.1183693787

C 2.4292728555 0.0999180504 1.3837523615

C 2.3966009999 0.045222022 -0.0567845653

C 1.189687758 -0.0579411481 -0.7549217844

C 1.2238802311 -0.0778445921 -2.1967040506

N 2.3340651874 -0.039577046 -2.8677363996

C 2.3376324081 0.0101401254 -4.2716700675

C 3.3940879963 -0.6173966075 -4.9464496821

C 3.4523089007 -0.6005576918 -6.3350784983

C 2.4699276311 0.0598913141 -7.0734135135

C 1.4313819618 0.7091994688 -6.4079761112

C 1.3627624483 0.6900245355 -5.0179762077

O 3.5672697961 0.1015939158 -0.6760371587

H 3.3740835123 0.0460449574 -1.6719508735

H 4.1524715545 -1.127767103 -4.3625246521

C -1.3115915723 -0.2665786372 -0.6638106372

C -1.2800585985 -0.1472816282 2.100966837

C 1.3103058435 0.1107595155 3.5255985355

C 3.6677678584 0.2122673221 2.0494831078

H 0.2781497901 -0.1352073623 -2.7374393783

H 4.2707296159 -1.1008156875 -6.842785938

H 2.5220440523 0.0812093847 -8.1567214592

H 0.6756633881 1.2461923521 -6.9725238448

H 0.5750184278 1.2332905092 -4.5068828269

C -2.4970299059 -0.333066255 0.0409258128

C -2.484990223 -0.2710262073 1.4393165854

H -1.2873967447 -0.1054435019 3.1828766103

H -3.411854916 -0.3225919551 2.0004989505

H -3.4355357513 -0.4356622046 -0.4942994019

H -1.3577048594 -0.3257217336 -1.7437759557

C 3.7217369808 0.2726162509 3.4258515213

C 2.5300990301 0.2216024426 4.16540057

H 0.4127409159 0.074655115 4.1296468374

H 4.5698126005 0.2504473262 1.452191879

H 4.6766385583 0.3592567745 3.9333052821

H 2.5628350158 0.2692303678 5.2492690377

5E

C -0.1409039032 -0.0021126081 0.1871536369

C -0.1251896947 -0.0021396013 1.6087397433

C 1.1556396107 -0.0032392126 2.3309835758

C 2.3722433654 -0.004072741 1.6140398706

C 2.3953631935 -0.0041403079 0.140905176

C 1.1215483052 -0.0035087984 -0.5633778858

C 1.1370613083 -0.0045873939 -1.9527448122

N 2.2552201114 -0.0056908272 -2.6873736487

C 2.3756882175 -0.0069707928 -4.0826570155

C 3.67270818 -0.0106814572 -4.6153083046

C 3.8683389743 -0.0121151088 -5.9908600794

C 2.7775888407 -0.0099012724 -6.85897644

C 1.4877282971 -0.0061269616 -6.3306108994

C 1.2790729774 -0.0045908791 -4.9552948731

O 3.4953779104 -0.0049676335 -0.4566379037

H 3.1000524676 -0.0057602848 -2.0874061293

H 4.5221620713 -0.012516642 -3.9395100159

C -1.3950849064 -0.0004521547 -0.4577688127

C -1.3510809815 -0.0008196338 2.3005616782

C 1.2346070375 -0.0035711647 3.738299041

C 3.6029690436 -0.0050993073 2.289532081

H 0.2078619645 -0.0048865328 -2.5072480812

H 4.8796713011 -0.0150099633 -6.3839202527

H 2.9298315227 -0.0110323014 -7.9325012522

H 0.6292064251 -0.0042309951 -6.9944059584

H 0.2644892439 -0.0012938649 -4.5751039582

C -2.5856907267 0.0008142576 0.246422675

C -2.5674376743 0.0005563444 1.6424520803

H -1.3538881063 -0.0007667423 3.3831097039

H -3.4932490732 0.0015937057 2.2076173182

H -3.5284033683 0.0021199599 -0.2913160929

H -1.4512025989 0.0001229699 -1.5397758451

C 3.6523019465 -0.0053817833 3.6710288775

C 2.4543448251 -0.0046191417 4.3948276

H 0.3316455809 -0.0030541677 4.3352590251

H 4.503642001 -0.0057711158 1.6878119466

H 4.6060107608 -0.0062271061 4.1882386299

H 2.4752455502 -0.0048587401 5.4803256015

6F

C -0.6859822221 3.236292572 -1.3262050635

C -0.6117518449 4.5636085461 -0.946487454

C 0.0358197325 4.8901863326 0.2541266068

C 0.5940675863 3.9084735762 1.0561578634

C 0.5278274976 2.5573803955 0.6806598688

C -0.1227124733 2.2143174492 -0.5383247318

C -0.2177875245 0.8398489933 -0.971733202

N 0.3040287785 -0.1217092043 -0.2920297069

C 0.2644676112 -1.4467102219 -0.7322471097

C 0.123211818 -2.4839907611 0.2183041644

C 0.087259514 -3.811095778 -0.2210433766

C 0.210067216 -4.1321815196 -1.5700553452

C 0.3690301244 -3.1108514578 -2.5035303096

C 0.3952897489 -1.7843413566 -2.0883902762

O 1.0749620409 1.6534979746 1.4904205989

C 0.044551654 -2.184255923 1.6916914714

O 0.7214073129 -1.3406491626 2.2501845803

N -0.8123851569 -3.0005620446 2.3955181259

H -1.1824570678 2.9580583754 -2.252277763

H -1.0472156209 5.3397881705 -1.5652415761

H 0.1010852811 5.9285779213 0.5645570894

H 1.0928998646 4.1517558101 1.9874055867

H -0.7734013915 0.6524365079 -1.9008807998

H -0.0054822827 -4.6029686845 0.5146182471

H 0.2012309851 -5.1699143522 -1.8851513981

H 0.4860647731 -3.3459113818 -3.5566178026

H 0.5549848331 -0.993113414 -2.8126932358

H 0.9359508458 0.7459290475 1.1103655561

H -1.5855495227 -3.4356322188 1.917708775

H -0.9653921108 -2.7305541914 3.3563806169

6E

C 3.5223946429 -0.5306218952 0.8942591428

C 4.4131183747 -1.5607635388 0.8229481274

C 3.9894717087 -2.8180459879 0.2896719228

C 2.7151340336 -3.0252745624 -0.1520830854

C 1.717563444 -1.9785192597 -0.097656042

C 2.1742898109 -0.6891474056 0.4454157595

C 1.2937395733 0.3837345471 0.5079924008

N 0.013511253 0.2997240505 0.1390938486

C -0.8967298577 1.3601516028 0.0749265812

C -2.2886756783 1.1112924754 0.0754329647

C -3.1703609957 2.1944109733 -0.0069250095

C -2.7128184097 3.50483781 -0.0879437936

C -1.3406178104 3.7415325558 -0.1132913872

C -0.4445995382 2.6823370737 -0.0466538012

O 0.540564002 -2.1555528094 -0.4884646699

C -2.826279482 -0.2820430564 0.2390147402

O -2.2650557654 -1.1307002064 0.9082664399

N -4.0370931986 -0.5202485308 -0.3700015982

H 3.8238738217 0.435159948 1.2936555976

H 5.4349742739 -1.4367745157 1.1627134125

H 4.7104464271 -3.6298948517 0.2384970625

H 2.3955289215 -3.9808837646 -0.553157133

H 1.6404979647 1.3391556438 0.892954832

H -4.2363858441 1.9991948177 0.0335279835

H -3.417070842 4.327713086 -0.1356506402

H -0.9609990088 4.754175467 -0.2012539163

H 0.6177137666 2.8802252336 -0.1241231031

H -4.3200705014 -1.4899071086 -0.369462013

H -4.2917610395 0.0176265847 -1.1835930566

H -0.2551640465 -0.6772443761 -0.1044515669

7F

C 0.1242603022 3.1275790474 -1.5241545682

C 0.2350799549 4.4788975056 -1.0709534781

C 0.5827414536 4.7276986226 0.2873283323

C 0.8134988563 3.7100735209 1.1653518991

C 0.7124951259 2.3565557146 0.7448038597

C 0.3693201305 2.0499677806 -0.591787678

C 0.2581618592 0.6680688465 -0.9845594177

N 0.5028214226 -0.2978850773 -0.158797952

C 0.4509331795 -1.6346930613 -0.5572190731

C -0.0150538333 -2.6121451209 0.3533543771

C -0.0617923634 -3.9512012925 -0.047428758

C 0.3583505297 -4.3455978275 -1.3144837833

C 0.8344641005 -3.385613266 -2.2042331789

C 0.8801566406 -2.0480219466 -1.8290375651

O 0.9464933741 1.4381149721 1.6695282027

C -0.4284832631 -2.2390053079 1.7512666845

O 0.1559419911 -1.4194953944 2.4361312688

N -1.4944057009 -2.9582383265 2.2446903936

C 0.0025514317 5.5487987126 -1.96560281

H -0.0666326533 0.4436113343 -2.0041676471

H -0.4038541574 -4.6968199679 0.6624440136

H 0.3326158818 -5.3928832979 -1.5950258826

H 1.1856268739 -3.6786555008 -3.1885324355

H 1.2879998233 -1.3093479666 -2.5103221309

H 0.8254864067 0.5284346301 1.2623838977

H -2.160947859 -3.3579275111 1.603295059

H -1.8553026826 -2.6309510247 3.1290895987

C -0.2176566968 2.9282163944 -2.8857364366

H 1.0772643278 3.8914280361 2.2009169206

C -0.3310497421 5.3175366761 -3.2800769131

C -0.4395745639 3.9904456106 -3.7365971855

H 0.6626514331 5.7593690164 0.6184162871

H 0.0947119567 6.5639833669 -1.5901420131

H -0.3072522453 1.9250787698 -3.284441555

H -0.5072603596 6.144835555 -3.9590667412

H -0.699930935 3.7973677771 -4.7726035915

7E

C 2.82055 -1.54368 0.01114

C 4.14143 -1.03509 -0.11766

C 4.34316 0.37657 -0.341

C 3.31751 1.25163 -0.42996

C 1.93155 0.82112 -0.3061

C 1.69231 -0.61595 -0.10431

C 0.38519 -1.06824 -0.06513

N -0.69691 -0.27321 -0.12326

C -2.02189 -0.70737 -0.20039

C -3.09089 0.18291 0.07006

C -4.40572 -0.29405 -0.00542

C -4.69149 -1.60957 -0.35009

C -3.63784 -2.46783 -0.65821

C -2.32584 -2.0198 -0.59687

O 1.00928 1.65548 -0.38198

H -0.46777 0.73383 -0.08622

C -2.83297 1.60359 0.48269

O -1.84177 1.9469 1.10432

N -3.8271 2.49764 0.15739

C 2.67894 -2.92577 0.24924

C 5.24593 -1.90089 -0.02231

H 5.37016 0.72354 -0.4323

H 3.4727 2.31272 -0.59128

H 0.17888 -2.12654 0.03471

H -5.2149 0.38231 0.24823

H -5.71778 -1.95769 -0.38462

H -3.83455 -3.49068 -0.96329

H -1.529 -2.69133 -0.89177

H -4.41375 2.31254 -0.64112

H -3.59275 3.46639 0.32324

C 3.77903 -3.7649 0.33524

C 5.07646 -3.25641 0.19759

H 6.24107 -1.47806 -0.12549

H 5.93422 -3.91612 0.27035

H 3.62775 -4.82387 0.51977

H 1.69502 -3.36004 0.38506

8F

C -0.162228739 3.1217170219 -1.4129561464

C -0.0243629206 4.4801031957 -1.0752499888

C 0.533006509 4.8039208 0.2071194109

C 0.918321414 3.7659187537 1.0810239439

C 0.7784187104 2.4341292609 0.7353582856

C 0.2251282232 2.1023081615 -0.5540426211

C 0.0590695882 0.7262011209 -0.9740729092

N 0.4266785555 -0.2577331191 -0.2328040433

C 0.3192697994 -1.5843488696 -0.659070687

C -0.0287627135 -2.5837964834 0.2781659889

C -0.1272382893 -3.9117519184 -0.1483732254

C 0.1319668484 -4.2710559635 -1.468317725

C 0.4927955578 -3.287856611 -2.386113376

C 0.5836065546 -1.9596480793 -1.9850848801

O 1.1552116358 1.4981139515 1.6107141383

C -0.2603644844 -2.2456180282 1.7275454276

O 0.4142678967 -1.4498955315 2.3542896347

N -1.2635756339 -2.9709312644 2.329615331

C -0.414389054 5.5281568348 -1.9520278582

C 0.6732291954 6.1765795155 0.5503319234

H -0.4136321842 0.566206406 -1.9529047435

H -0.3790639914 -4.6768294694 0.5782893282

H 0.07065515 -5.3107886992 -1.7706890398

H 0.7163186418 -3.5545967004 -3.4140793292

H 0.8989017628 -1.1999512677 -2.6919240235

H 0.9771523968 0.6005898146 1.2336319305

H -2.0062010564 -3.3532067549 1.7659892339

H -1.5082470584 -2.6691958293 3.2616250419

C -0.2645835424 6.8419791076 -1.5869565535

C 0.2858967422 7.1646715492 -0.3209525588

H -0.5817733252 2.859824444 -2.3816964655

H 1.3353562996 4.0008370844 2.0545714666

H -0.8343170617 5.2675309963 -2.919572613

H 1.0940089198 6.4305115543 1.5185629412

H -0.5644980533 7.6367433723 -2.2617106851

H 0.4011477064 8.2070316441 -0.0403845543

8E

see text

9F

C -0.6712195724 3.1946198021 -1.4681308292

C -0.7058030142 4.5033916329 -1.0840617741

C -0.295584134 4.8750844834 0.2305133343

C 0.1498167251 3.8719855501 1.1419187051

C 0.1823573656 2.5033677295 0.7175730442

C -0.225283163 2.1653802271 -0.5884458917

C -0.2049952501 0.7963394849 -1.0322714124

N 0.2048132974 -0.1592240058 -0.2654907352

C 0.2833836017 -1.4823304546 -0.7022601755

C 0.0244878219 -2.5272369742 0.2155511949

C 0.1060678119 -3.8539077559 -0.2194444252

C 0.4561376239 -4.1679230646 -1.5295097421

C 0.7287119148 -3.1391002824 -2.4281654771

C 0.6433249299 -1.8136724183 -2.0185652243

O 0.59732491 1.6009612573 1.5948829451

C -0.3039243132 -2.2348544141 1.6548496178

O 0.2404045545 -1.3674476351 2.3136092464

N -1.2327061095 -3.0841870241 2.2136127406

H -0.9844189679 2.9089900811 -2.4689076832

H -1.0446913375 5.2752751034 -1.7670991563

C -0.3166914587 6.219924374 0.6708218251

C 0.5520378235 4.2392116289 2.4476554041

H -0.57416093 0.5981592735 -2.0473136829

H -0.0768725256 -4.6500592011 0.4943621285

H 0.5338658916 -5.2045844721 -1.8385142473

H 1.0224211704 -3.3674614939 -3.4477749435

H 0.8922881987 -1.0169104999 -2.7108773432

H 0.5485461399 0.6923546416 1.1748256612

H -1.9011179112 -3.5474399327 1.6186720497

H -1.5497079486 -2.8216440064 3.1355945983

C 0.0804163451 6.5545059332 1.9464875284

C 0.5181287237 5.5572323904 2.8436944489

H -0.6539317788 6.9880025232 -0.0189138338

H 0.8847172066 3.4598921961 3.1223566083

H 0.0569626813 7.5917645631 2.2658412916

H 0.8281236776 5.8322807594 3.8464242043

9E

C 2.8338455608 -1.6504935689 -0.1228081259

C 4.1302849948 -1.285619966 -0.2542978669

C 4.4960576952 0.0985483091 -0.4511315512

C 3.4899565841 1.0948970336 -0.5033798274

C 2.0644721368 0.7371429736 -0.3528768455

C 1.7608352876 -0.6888414631 -0.1697847392

C 0.4550387416 -1.1254860086 -0.064592545

N -0.632997846 -0.3340975681 -0.0619513329

C -1.9601447264 -0.7658198784 -0.0533092247

C -3.0150161277 0.1494390381 0.1971048944

C -4.3327145491 -0.3252603251 0.2204629054

C -4.6394254056 -1.6585894304 -0.0147979106

C -3.6033834749 -2.5434603261 -0.3063750505

C -2.2881122585 -2.1034334408 -0.3344041527

O 1.1749359491 1.6010156733 -0.3838222094

H -0.4318262318 0.6736121626 -0.0113805551

C -2.7378700499 1.5955598209 0.4721884437

O -1.6764724224 1.9964204244 0.9235336527

N -3.7784725388 2.4636427363 0.2290386094

H 2.5732383135 -2.696622778 0.0207779966

H 4.9211947178 -2.0279443099 -0.2178041794

C 5.8389059876 0.4942086221 -0.5955357844

C 3.8418751824 2.437970726 -0.6940605802

H 0.2790590227 -2.1907533168 0.0458268593

H -5.1291355097 0.3674068262 0.4682836687

H -5.667547341 -1.9999323372 0.022496569

H -3.8176201792 -3.5853867235 -0.5209948613

H -1.5094347083 -2.8054824311 -0.6034171541

H -4.4613607237 2.2285651502 -0.4737922379

H -3.5185307099 3.4381167056 0.2843794349

C 6.1708959926 1.826213127 -0.7853730353

C 5.1700236092 2.8064312893 -0.8357367616

H 3.0420346604 3.1691995535 -0.724726617

H 5.4359118785 3.8479666222 -0.9836633205

H 6.6175056647 -0.262195535 -0.5562945796

H 7.2129128235 2.111032613 -0.8947319857

10F

C 0.07397 3.18756 -1.55742

C 0.04464 4.54384 -1.12159

C 0.17522 4.84724 0.30058

C 0.3321 3.79101 1.23264

C 0.35944 2.42143 0.77405

C 0.23141 2.11193 -0.58619

C 0.24173 0.72802 -0.98233

N 0.40425 -0.23033 -0.1245

C 0.47218 -1.56714 -0.51964

C -0.07562 -2.56796 0.31707

C -0.00141 -3.90675 -0.08051

C 0.61611 -4.27781 -1.27146

C 1.17049 -3.29406 -2.08685

C 1.0997 -1.95683 -1.71435

O 0.50044 1.50161 1.71036

C -0.70699 -2.2179 1.63686

O -0.26548 -1.37681 2.39846

N -1.80375 -2.98252 1.9679

C -0.04499 2.93455 -2.94333

C -0.1078 5.56351 -2.08399

C 0.15524 6.16349 0.81018

C 0.46056 4.06363 2.61054

H 0.08045 0.48649 -2.0352

H -0.40866 -4.66912 0.57505

H 0.68009 -5.3243 -1.54862

H 1.67354 -3.56762 -3.00883

H 1.56781 -1.19874 -2.33259

H 0.48213 0.58768 1.27445

H -2.34948 -3.4069 1.23476

H -2.3064 -2.67316 2.78712

C 0.28297 6.41711 2.16271

C 0.43705 5.36195 3.0746

H 0.03771 7.00311 0.1372

H 0.57741 3.22827 3.28891

H 0.26312 7.4424 2.51841

H 0.53661 5.56593 4.13538

C -0.19386 3.95464 -3.86201

C -0.22725 5.28574 -3.43094

H -0.01491 1.91768 -3.31352

H -0.13176 6.59851 -1.76683

H -0.2824 3.71866 -4.91761

H -0.34301 6.09348 -4.14562

10E

C 1.83490086 -1.4071701003 0.3525400861

C 3.1715132065 -1.0270393728 0.0595183641

C 3.4677352232 0.3559937359 -0.3511320827

C 2.4451902066 1.3294680332 -0.3421337444

C 1.0454894884 0.9787026717 -0.0125310894

C 0.744017179 -0.4364068714 0.2037110808

C -0.5711496466 -0.8517518836 0.1725681816

N -1.6517052149 -0.0467678157 0.1305298732

C -2.9662623014 -0.4630658342 -0.0738507244

C -4.0495718523 0.4197642379 0.1749125821

C -5.3579605693 -0.0477721022 -0.0055797656

C -5.6258110305 -1.3377687101 -0.442785548

C -4.5568523647 -2.1822146105 -0.7363173287

C -3.250116343 -1.7493595273 -0.5654614754

O 0.169871923 1.8545523575 0.0122420828

H -1.4686660516 0.9465276984 0.3091247138

C -3.813580628 1.8192995229 0.6521012721

O -2.7952076259 2.1654383498 1.2316593852

N -4.8422167293 2.7099582397 0.4396588729

C 1.6001494813 -2.7185168674 0.8103360316

C 4.1914310511 -1.9846230247 0.199515254

C 4.7560949856 0.7727522752 -0.7375697005

C 2.7215505176 2.6615990125 -0.6808842101

H -0.7851868444 -1.9131921413 0.1754527468

H -6.183632117 0.6097780997 0.2422460632

H -6.6490512939 -1.675345677 -0.5610026058

H -4.7381430592 -3.184720583 -1.1101432465

H -2.4393783945 -2.4098709263 -0.8451583619

H -5.4622548058 2.5670838522 -0.3417846279

H -4.5956722413 3.6694972555 0.6365218923

C 5.0172368273 2.0907601521 -1.0792342581

C 3.9986174043 3.0488492339 -1.0464244039

H 1.8977448275 3.3649846257 -0.6504246884

H 4.2066766661 4.0801757684 -1.311517576

H 5.5688985638 0.058646388 -0.7824290065

H 6.0224506626 2.3757998071 -1.3741003374

C 2.6209133657 -3.6469879858 0.928158714

C 3.9304284807 -3.2802781527 0.6138841479

H 0.6015294119 -3.0095660224 1.1160401936

H 2.4007927189 -4.6480271062 1.2850290076

H 4.7422430814 -3.9928300992 0.7140006942

H 5.2180068598 -1.7066025592 -0.0044361257

11F

C 0.1873849004 -0.695993459 -0.0038916266

C 0.0536088968 -0.5871907492 1.3687435825

C 1.0306043129 0.1101846486 2.0929748146

C 2.1205566588 0.6831358823 1.45668521

C 2.2642017349 0.5805468366 0.0656096864

C 1.2753136508 -0.1160537638 -0.6818850795

C 1.3781275303 -0.2456185507 -2.118669861

N 2.3218944662 0.3129506262 -2.7938233382

C 2.363184416 0.2240733263 -4.1878911382

C 3.586943895 0.0000158241 -4.8649358738

C 3.5964036264 -0.0247459546 -6.2655318636

C 2.4347681852 0.169719783 -7.0021300835

C 1.2339039942 0.4062359012 -6.3358566456

C 1.2018371164 0.4371593509 -4.9474694966

O 3.3322146293 1.136977412 -0.5071107478

H 3.2965942501 0.9359083144 -1.4786677607

C 4.8497527057 -0.2332982815 -4.1081586968

H -0.5570440499 -1.2329145955 -0.5859985457

H -0.7922034778 -1.0353823291 1.8772970826

H 0.6178193683 -0.8645250021 -2.6132678261

H 4.5362613301 -0.204390772 -6.7706095566

H 2.4684827389 0.1469216882 -8.085760724

H 0.3206499739 0.5771756285 -6.8970385484

H 0.2774886837 0.6647810617 -4.4281827163

O 4.9489687089 -0.3930185 -2.9132949942

O 5.9262048563 -0.2516437478 -4.9299777602

C 7.179446466 -0.4841353155 -4.2771960952

H 7.9297089792 -0.469842393 -5.0676663678

H 7.3814006905 0.2981609537 -3.5417781343

H 7.1758880814 -1.4509957346 -3.7681082731

H 2.8847053357 1.2176221451 2.0094886883

H 0.9377350833 0.2018792154 3.1708158423

11E

C 0.0265586478 -0.530668266 0.004194524

C -0.0885413173 -0.4414630985 1.3583017501

C 0.9978186582 0.0930930893 2.1241429767

C 2.1536806363 0.5172922014 1.5405904019

C 2.3492935306 0.4441499943 0.1044886456

C 1.2161103187 -0.0985039049 -0.6672442236

C 1.289411514 -0.1873407848 -2.0475283024

N 2.3606342162 0.1544118015 -2.7776148514

C 2.4047326204 0.1629193257 -4.1758556848

C 3.6321825447 0.0551679258 -4.8779189021

C 3.617535779 0.0469213072 -6.2797141296

C 2.4344585699 0.1460431337 -6.9964091546

C 1.2312363402 0.272792819 -6.3033415746

C 1.2179227719 0.2899776426 -4.9164722927

O 3.4056017749 0.8120269839 -0.4455808828

H 3.1960199251 0.4122622313 -2.2219198038

C 4.9265249727 -0.0462298767 -4.1554201305

H -0.7882833083 -0.930794313 -0.5950132348

H -0.9915880614 -0.7670419859 1.8619405148

H 0.43727853 -0.5838452013 -2.5925820077

H 4.5632308619 -0.0397603064 -6.798047388

H 2.4501389642 0.1396609485 -8.0803095228

H 0.2964734469 0.3788159053 -6.8442939621

H 0.2796669291 0.443939567 -4.3981447746

O 5.0753319289 0.100549578 -2.9615075617

O 5.9566541918 -0.3188430851 -4.9830644436

C 7.2391004844 -0.3992189109 -4.3458938653

H 7.9495298284 -0.6111286103 -5.1444765429

H 7.4824795851 0.5445384467 -3.8527497075

H 7.2474069425 -1.1980594277 -3.6009719658

H 2.9766597445 0.9193904443 2.1213785225

H 0.8883934043 0.1582183606 3.2036767773

12F

C -0.0319868932 0.0934053082 -0.0340019797

C -0.0824404511 -0.0481451016 1.3879329016

C 1.0493922235 -0.5753392227 2.0717659356

C 2.1804682752 -0.9461766057 1.4051988114

C 2.2602456282 -0.8140272642 -0.0064191954

C 1.1673649973 -0.2996402412 -0.7376855444

C 1.2885081245 -0.152950834 -2.1675189953

N 2.3294337897 -0.5622168176 -2.818014557

C 2.3942356054 -0.4562361512 -4.2081636255

C 3.5953911543 -0.0717752794 -4.8560853888

C 3.6235947914 -0.0091400816 -6.2559575925

C 2.5091156022 -0.3274177063 -7.0210468404

C 1.3349016951 -0.7259333341 -6.384946678

C 1.281870958 -0.7910875058 -4.9990203687

O 3.4027022403 -1.1813421957 -0.56957033

H 3.3395421841 -1.0003777211 -1.553455404

C 4.8189989728 0.2727506855 -4.0767767546

C -1.1868150555 0.6106594275 -0.6742114833

C -1.2454098595 0.3304501488 2.0977508649

H 0.4804307273 0.3501614841 -2.7051213318

H 4.5426925057 0.2955254588 -6.7383727555

H 2.5604554554 -0.2767793177 -8.1030397695

H 0.4605980352 -0.9973067043 -6.9682482179

H 0.382374447 -1.1419026323 -4.505427557

O 4.9496952744 0.210063446 -2.8757067181

O 5.8274482239 0.6778788087 -4.8859529429

C 7.0452821425 1.0115142136 -4.2112507255

H 7.7425039836 1.3101395396 -4.994022862

H 6.8839816367 1.8316390791 -3.5074851484

H 7.4306759434 0.1494321293 -3.6617040519

C -2.3447116168 0.8366389534 1.4437764073

H 3.0477777416 -1.3436436661 1.9196266373

C -2.306990917 0.9734145222 0.043203683

H 0.9975938624 -0.6784194205 3.1520627368

H -1.2086000252 0.7253225984 -1.7510650928

H -1.2519999059 0.2111351057 3.177481375

H -3.2322118945 1.1246782069 1.996817508

H -3.1712345721 1.3674091991 -0.4823309614

12E

C -0.0738892157 -0.1383389457 -0.0039649697

C -0.1698624472 0.1216020347 1.3903450265

C 0.9808301757 0.6274982216 2.1008723094

C 2.1682923795 0.85071583 1.4982200688

C 2.361600122 0.6066527007 0.0734709212

C 1.1868005797 0.1543510779 -0.6909405188

C 1.2801597447 0.0726861798 -2.0663149671

N 2.3996550549 0.2675377438 -2.7878533515

C 2.4472212206 0.3240462526 -4.1821704647

C 3.6533545072 0.0767921114 -4.8883212049

C 3.6467251054 0.124528828 -6.2895457149

C 2.4927342589 0.4091730422 -7.0035895169

C 1.3136869895 0.6717068132 -6.3066696357

C 1.2935419905 0.6397267051 -4.9203334592

O 3.4692653567 0.796953495 -0.4560262554

H 3.2661232292 0.3752089687 -2.2399597923

C 4.9157732671 -0.2312579001 -4.1696753145

C -1.2091936529 -0.6765871636 -0.641111765

C -1.3721667548 -0.1260214686 2.0746570269

H 0.3997056738 -0.1766067218 -2.6461211323

H 4.5754211086 -0.0696482252 -6.8095229141

H 2.5140226197 0.4416804229 -8.0868995846

H 0.4052988469 0.9242067209 -6.844160728

H 0.3818745123 0.9040321236 -4.3991743219

O 5.07213716 -0.1741087468 -2.9682432662

O 5.9112018659 -0.5882662198 -5.0080455643

C 7.1647600938 -0.8729773888 -4.3727163976

H 7.8501852553 -1.1292647168 -5.1801478531

H 7.5243844222 0.0002245711 -3.823740738

H 7.0609024779 -1.708215862 -3.6764252088

C -2.4796093125 -0.6331090648 1.4179351984

H 3.0334853987 1.2151046515 2.0411624451

C -2.3873826676 -0.9132411174 0.0502125368

H 0.8660066887 0.8157516066 3.1660001176

H -1.1737921324 -0.9365579287 -1.6932284118

H -1.4158087366 0.0860681844 3.1392794373

H -3.4017547314 -0.8213810795 1.9570124497

H -3.24038294 -1.3283294116 -0.4773855484

13F

C 0.2604985028 -0.4319818595 0.0355235799

C 0.0711570543 -0.3060393297 1.424569049

C 1.0896939216 0.3549255526 2.1892146831

C 2.2402436879 0.848067205 1.5369036262

C 2.4097769384 0.7168422174 0.1723215872

C 1.3864442983 0.0652255897 -0.6040169567

C 1.5076514522 -0.0874502578 -2.040875464

N 2.4920648879 0.4041780499 -2.7056207563

C 2.5457855738 0.29985293 -4.0989686861

C 3.7584484268 -0.0214373291 -4.7549551021

C 3.7891750596 -0.0520347034 -6.1546252319

C 2.6570952915 0.2281917787 -6.9099788692

C 1.4674374358 0.5581391399 -6.2639022767

C 1.4155771226 0.5974354698 -4.8760134335

O 3.5232555166 1.192812892 -0.397188355

H 3.4909174353 0.9782336722 -1.3618556933

C 4.982970034 -0.3549143796 -3.9736294968

H -0.5040887935 -0.9293831291 -0.556769728

C -1.0830532794 -0.8060796799 2.084871502

C 0.8988485188 0.4839899854 3.5917609431

H 0.7171035379 -0.6634553523 -2.5397109317

H 4.7204747266 -0.3058576112 -6.6436979849

H 2.7056862223 0.1983303035 -7.9928686065

H 0.5788601319 0.7954168915 -6.8402729337

H 0.5035638587 0.8972510194 -4.3716964496

C -0.2295357798 -0.0107578452 4.1986255861

O 5.0350242985 -0.5570801869 -2.7822794544

O 6.0784822691 -0.4156491829 -4.7666409555

C 7.2954382175 -0.7504387812 -4.0893318143

H 8.0674579058 -0.7578458507 -4.8585976873

H 7.5249213289 -0.0078183238 -3.3216470649

H 7.2156621344 -1.7316854906 -3.6152168467

C -1.2338611353 -0.6636683076 3.4412207377

H -1.8459026419 -1.304453505 1.4932279202

H 1.6652118621 0.982616436 4.1774429154

H -0.3569963106 0.0975334 5.2712304451

H -2.1182227258 -1.048095593 3.93819979

H 3.0206555367 1.340480097 2.1073019362

13E

C 0.1497015141 -0.4016117359 0.0500837476

C 0.0086331051 -0.2765088592 1.4223216941

C 1.1020745062 0.3136018655 2.1807312734

C 2.2581174185 0.7384597502 1.5422379823

C 2.4458345544 0.6216748349 0.1333267462

C 1.3179453891 0.0278719232 -0.6146102487

C 1.40878419 -0.100734009 -2.003228912

N 2.491826185 0.2503966848 -2.6891467352

C 2.5827268786 0.2463211865 -4.0892171498

C 3.8153142372 0.0434698822 -4.7561402333

C 3.8346172608 0.0365269496 -6.1572039563

C 2.6792962476 0.2258099772 -6.9024903932

C 1.4710538485 0.4414231246 -6.2423135948

C 1.4266667146 0.4599114149 -4.8553410682

O 3.4931935452 0.9904916382 -0.4606997987

H 3.2757885726 0.5625481634 -2.0524355904

C 5.0793803567 -0.1693371088 -3.9989159981

H -0.6596975204 -0.8380027379 -0.5324089103

C -1.1709455666 -0.7047467573 2.1123420795

C 0.9298800445 0.4323058777 3.6017843099

H 0.5763242147 -0.525600402 -2.5595113149

H 4.7825276861 -0.124106781 -6.6531498193

H 2.7226339866 0.2185738012 -7.9857332968

H 0.561082762 0.6163441353 -6.806853302

H 0.4927634643 0.683392264 -4.3537183827

C -0.2125830657 0.0094084144 4.2144827774

O 5.20644416 -0.0482013255 -2.8019285811

O 6.1031243808 -0.5167591814 -4.8071309182

C 7.3587855983 -0.7094598022 -4.140744543

H 8.0689775055 -0.9707376599 -4.9247398341

H 7.6661470735 0.205822188 -3.6300153592

H 7.2826362818 -1.5140243624 -3.405923801

C -1.2846773742 -0.5695332028 3.4636988102

H -1.9760509242 -1.1427273112 1.528549745

H 1.7376325516 0.8701827163 4.1802846232

H -0.3174776456 0.110677199 5.2905171038

H -2.1817544408 -0.8970593852 3.9781637432

H 3.0714366377 1.1748366976 2.1131226892

14F

C 0.2079266523 -0.7930817573 0.0972447095

C 0.1048694243 -0.8046129584 1.4579253541

C 1.1602478917 -0.2796215112 2.2606899132

C 2.3263669925 0.2535043539 1.6347229952

C 2.4129339568 0.2577710843 0.2048317711

C 1.3512792711 -0.2572661452 -0.5637769767

C 1.4200773392 -0.2621745188 -2.0022772533

N 2.4153882544 0.2571580756 -2.6417340245

C 2.4461886482 0.295240084 -4.0358197155

C 3.6610478218 0.0865229052 -4.7364227587

C 3.6582696941 0.145654317 -6.1366946684

C 2.4997347046 0.4238647294 -6.8502094114

C 1.310642881 0.6536291792 -6.1602999202

C 1.2872133667 0.5910226944 -4.7736054127

O 3.517284157 0.7474944456 -0.3422279183

H 3.4491999372 0.6524000824 -1.3365438939

C 4.937690895 -0.1880886729 -4.0149589432

H -0.5948647466 -1.1932740254 -0.5163298607

H -0.7743064621 -1.2118849046 1.9460882901

C 1.0948192197 -0.2710388297 3.6745130713

C 3.3768941059 0.7681858084 2.4304795584

H 0.5943660965 -0.750671987 -2.5361895632

H 4.5890820991 -0.026436179 -6.6604807731

H 2.5274990558 0.4740652865 -7.9330863861

H 0.4005885112 0.8923230319 -6.7016963585

H 0.3708518544 0.8082737671 -4.2362464268

C 3.2804280541 0.7608178953 3.8035748592

C 2.1289077788 0.2369502543 4.4289899344

H 0.2095032529 -0.674753261 4.1568158877

H 4.253231085 1.1650787692 1.9327514815

H 4.0893446605 1.1573542226 4.4082429873

H 2.059984777 0.23479142 5.512348295

O 5.1322872215 -0.0873390733 -2.8251100434

O 5.9178374117 -0.5685958711 -4.8694762769

C 7.1887173584 -0.8168406091 -4.2585482141

H 7.8506633742 -1.1193008493 -5.0699486964

H 7.5661045285 0.0856232741 -3.7715634978

H 7.1087733719 -1.6103179711 -3.5118194191

14E

C 0.1060849576 -0.5585202541 0.1312636851

C -0.0090161799 -0.5555963405 1.4793315465

C 1.1079311147 -0.1884887337 2.320251319

C 2.3463077231 0.1705894124 1.7331800176

C 2.5135480475 0.1724268488 0.2648921577

C 1.3351202644 -0.1980861188 -0.5314058057

C 1.3848817965 -0.1982061982 -1.9104692602

N 2.468028709 0.0853131895 -2.6588490053

C 2.4786015188 0.1737974874 -4.0518930668

C 3.6884928478 0.0622515951 -4.78630084

C 3.6479792502 0.1339921481 -6.1862196185

C 2.4573991142 0.3155810946 -6.8724557205

C 1.2730928652 0.4472445468 -6.1474061815

C 1.2842482827 0.3864957187 -4.7623159441

O 3.5949169625 0.4706618589 -0.2624576793

H 3.3482193814 0.2161691651 -2.1411596953

C 4.9900815305 -0.1248852644 -4.0985555935

H -0.7439757772 -0.8345019448 -0.4884769154

H -0.9456011493 -0.8271878942 1.9558033354

C 1.0029102294 -0.1766654276 3.7234367156

C 3.4314101902 0.5251650768 2.5459893737

H 0.4875672143 -0.4744363781 -2.4557089357

H 4.5805981681 0.0432268356 -6.7271258057

H 2.4524256396 0.3691867608 -7.9550863943

H 0.3329538956 0.6174355746 -6.6621844679

H 0.3600159695 0.5442135158 -4.2209605805

C 3.3070427371 0.5312652281 3.9260940739

C 2.0846583517 0.1779165231 4.5140175254

H 0.0574780755 -0.4506322888 4.1827581006

H 4.3619979643 0.7908557061 2.0572306744

H 4.1507913327 0.8074039061 4.5499551217

H 1.9834598602 0.1809228228 5.5950282781

O 5.1638614645 -0.0708354512 -2.8985801851

O 6.0002145936 -0.3624039142 -4.9603579145

C 7.2890176141 -0.5267608446 -4.353283261

H 7.98030842 -0.6998493872 -5.1776163864

H 7.5689393099 0.3706409418 -3.7969451051

H 7.2848088868 -1.3781884308 -3.6690511434

15F

C 2.1272392742 1.3862302698 0.2387768815

C 3.4355524938 0.8219923358 0.2607520677

C 3.615564199 -0.5934507371 -0.0476229107

C 2.488819743 -1.3908368727 -0.3693954442

C 1.1702711229 -0.8023455195 -0.3871294065

C 0.9779144485 0.5510775386 -0.0860891215

C -0.3646823026 1.0726097696 -0.0754542575

N -1.3869049361 0.3591860778 -0.4318171059

C -2.6712561862 0.9024886554 -0.464604518

C -3.7948254402 0.1361751768 -0.0628115932

C -5.0706531917 0.7130446464 -0.124679318

C -5.2616345022 2.0079579691 -0.5884570726

C -4.1603481995 2.753040343 -1.0064113697

C -2.8860124646 2.2057543891 -0.9461311314

O 0.1754477215 -1.6193629895 -0.6833108797

H -0.6912966953 -1.1026014494 -0.6289766719

C -3.6470523263 -1.2671981711 0.4194045941

C 1.9953636628 2.7644317131 0.5252124822

C 4.5291805628 1.6541430746 0.5776848076

C 4.8777046528 -1.2257711423 -0.0450495231

C 2.6417917564 -2.760520375 -0.6695850559

H -0.5219359203 2.0938155026 0.2789341948

H -5.9179990804 0.1215599745 0.1955525943

H -6.2609017503 2.426402719 -0.636069942

H -4.2939726925 3.7590958668 -1.3915001209

H -2.0356975676 2.7713140982 -1.3104090103

C 3.0856938465 3.5535993992 0.8337870929

C 4.3687200074 2.9950687215 0.8633998276

H 5.5287265274 1.2383274548 0.598288802

H 5.2307882727 3.6081028994 1.1036362169

H 2.942463213 4.6076886992 1.048901617

H 1.0198674664 3.2333003015 0.4978378116

C 3.8897864728 -3.3467906719 -0.6572331254

C 5.0139889175 -2.5684828666 -0.3422448254

H 5.767753251 -0.6579172138 0.1940249612

H 1.7558247953 -3.3351453946 -0.9073835001

H 4.0019542755 -4.4007308608 -0.8885933471

H 6.0004549412 -3.021208935 -0.3303427861

O -2.6535492405 -1.9540024437 0.348992152

O -4.7994871327 -1.7302085696 0.9610468303

C -4.7500939659 -3.0865216435 1.4168742703

H -5.7404469637 -3.2970457452 1.8205076293

H -4.5202244716 -3.763850176 0.5908263734

H -3.9871870543 -3.2055288551 2.189881998

15E

C 0.0090926779 -0.4018911468 0.1000711836

C -0.1231669406 -0.2160590039 1.5019126512

C 1.0407714633 0.2043773607 2.3008267638

C 2.3097208986 0.3208418613 1.6932247631

C 2.4937429599 0.1089326793 0.2404162119

C 1.293143151 -0.1331372899 -0.5600802025

C 1.3747475412 -0.0289969376 -1.9327143967

N 2.5055546343 0.1274576069 -2.6515814945

C 2.5469117462 0.3994581803 -4.0188396726

C 3.7104915664 0.1274963523 -4.7858559756

C 3.6995267783 0.3933276712 -6.1625890437

C 2.5826002281 0.9181136076 -6.7943545553

C 1.4483619529 1.2042994019 -6.0346692424

C 1.4337875777 0.9592790383 -4.6698584483

O 3.6207992771 0.1917472853 -0.266523478

H 3.3879334208 0.0221346413 -2.1370112324

C 4.9315042825 -0.4324419029 -4.1550807253

C -1.109144801 -0.8700130937 -0.6175296247

C -1.3697297719 -0.4685854053 2.1016185068

C 0.9549418872 0.479299214 3.6792145459

C 3.436770802 0.6731299409 2.4492680366

H 0.4654783858 -0.0729383883 -2.519598437

H 4.5949035735 0.1759221918 -6.7297317776

H 2.5993587094 1.1161967894 -7.8599503695

H 0.5725705694 1.6413742529 -6.5035479742

H 0.5634858228 1.2432378927 -4.0915359536

C -2.3294816002 -1.1005210709 -0.0050441615

C -2.4654889692 -0.8922855242 1.368255716

H -1.4836267931 -0.3454982821 3.1714444613

H -3.4118445703 -1.0801761296 1.8641251196

H -3.1678422146 -1.4612569527 -0.5923075321

H -1.0156258007 -1.09181996 -1.6745426447

C 3.3283456332 0.9278166694 3.804879621

C 2.0739774206 0.8341267466 4.4167114311

H 0.0004120311 0.4248114707 4.1874235338

H 4.3847668751 0.7424310107 1.9288359532

H 4.2026662561 1.2038219493 4.3850041902

H 1.969657723 1.0405814876 5.4774286791

O 5.0995554471 -0.5873930357 -2.9628982462

O 5.8756998504 -0.7613340574 -5.0610055502

C 7.0894969236 -1.2875379066 -4.5081493089

H 7.7358294698 -1.4900184415 -5.3617836041

H 7.5531775893 -0.5607721355 -3.8372785647

H 6.890648019 -2.2051873925 -3.9499403532

16F

C -3.2064173940 -1.3210416542 -0.8172311589

C -4.5511979648 -1.0199816210 -0.6921376678

C -4.9266017469 0.1238136991 0.0266753500

C -3.9760886204 0.9515610233 0.6050570674

C -2.6113163035 0.6523669909 0.4874570238

C -2.2175012742 -0.5089027389 -0.2318638664

C -0.8233499032 -0.8696495658 -0.3638752284

N 0.1235839887 -0.2022887148 0.2007602208

C 1.4450414813 -0.6537242898 0.1406889043

C 2.5237381141 0.2410974590 -0.0853342632

C 3.8299405701 -0.2705956314 -0.0623358662

C 4.0916218592 -1.6166619055 0.1653270184

C 3.0283245081 -2.4854060038 0.4027984171

C 1.7250100787 -2.0047005729 0.3993683477

O -1.7228108999 1.4717409657 1.0543615100

H -0.8174482373 1.1215628431 0.8473658583

C 2.2903605200 1.6946736502 -0.3651736661

O 1.1877403709 2.1357776911 -0.6252843763

C 3.4907287243 2.6318849654 -0.3127000491

H -2.8902356456 -2.2027391870 -1.3690354623

H -5.3036666857 -1.6571955332 -1.1433155059

H -5.9791625152 0.3696685356 0.1327704260

H -4.2581965392 1.8414806646 1.1567730289

H -0.5998311307 -1.7466295558 -0.9856505417

H 4.6584314568 0.4039613542 -0.2391183905

H 5.1130678616 -1.9813482076 0.1665826595

H 3.2111962696 -3.5364030280 0.6036310233

H 0.8997908556 -2.6683207362 0.6337042701

H 4.0233456258 2.5442235607 0.6399273442

H 3.1343545260 3.6544125207 -0.4428535141

H 4.2053325466 2.4026778952 -1.1108743393

16E

C 3.2954708114 -1.4723231410 0.5473067107

C 4.6052312306 -1.1137401222 0.4542540095

C 4.9470308112 0.1925602636 -0.0272904066

C 3.9993128079 1.0996087214 -0.3937053469

C 2.5821819873 0.7922997837 -0.3084654147

C 2.2506229832 -0.5639384222 0.1716038247

C 0.9322372299 -0.9763916558 0.2484267956

N -0.1302598086 -0.2093857999 -0.0455170790

C -1.4516296091 -0.6609768205 -0.0900963295

C -2.5483512821 0.2373202461 0.0397889551

C -3.8488952104 -0.2920447560 0.0117469982

C -4.0931364859 -1.6491155281 -0.1442212955

C -3.0114021425 -2.5164136991 -0.2959383582

C -1.7136641921 -2.0279126262 -0.2792762766

O 1.6994480045 1.6148402877 -0.6169243291

H 0.0810333919 0.7838415326 -0.2421304346

C -2.3480680749 1.7084504746 0.2023715563

O -1.2472172502 2.2205070221 0.0927009587

C -3.5529960945 2.5859214271 0.5076881737

H 3.0161648221 -2.4612880149 0.9048127751

H 5.3933968074 -1.8040601329 0.7343202561

H 5.9992252488 0.4577475824 -0.0987273066

H 4.2590397625 2.0891450205 -0.7547777718

H 0.7201472409 -1.9841181574 0.5946382282

H -4.6854426508 0.3873326636 0.1139497249

H -5.1098402051 -2.0248703590 -0.1622924887

H -3.1769043869 -3.5779033742 -0.4490975976

H -0.8919653932 -2.7099963192 -0.4585220476

H -4.2600366833 2.5883411764 -0.3290808004

H -3.1946063680 3.6023933563 0.6719529623

H -4.0910821073 2.2366252586 1.3946751980

17F

C 2.4957615524 -0.9927304656 0.2562647817

C 3.8553462784 -0.5668650685 0.132398264

C 4.1311494962 0.7258838793 -0.3953086143

C 3.1312305324 1.5689594541 -0.7843074784

C 1.7730966699 1.1720011467 -0.6725214894

C 1.4393683619 -0.0990008592 -0.1583427361

C 0.0476728389 -0.4629194145 -0.0377524564

N -0.9078607589 0.300342972 -0.4586340924

C -2.2393318705 -0.1121631177 -0.3938725273

C -3.26523597 0.7774154605 0.0237582193

C -4.591826385 0.3238846097 -0.0023488346

C -4.9258531647 -0.9601392918 -0.4156273666

C -3.9160526111 -1.8232468308 -0.8344687981

C -2.5930730665 -1.3996060533 -0.8293154621

O 0.8626566802 2.0552909967 -1.0626717451

H -0.0399695809 1.6561460575 -0.8885146495

C -2.9547280842 2.1589653051 0.5089938532

O -1.8169733043 2.5298975824 0.7261409366

C -4.1121308144 3.123800992 0.7368910335

C 2.2692177401 -2.2913533832 0.7792651792

C 4.9063717654 -1.4255306871 0.5302678299

H 5.1684298985 1.036659546 -0.4831022507

H 3.3329625882 2.5567397459 -1.1823219921

H -0.199177734 -1.4065496847 0.4553981293

H -5.3829808951 0.9901641792 0.3193778349

H -5.9622257103 -1.2791581429 -0.4197485296

H -4.1576634575 -2.8241683279 -1.1778495909

H -1.8106521412 -2.0523838794 -1.2008063891

H -4.7441028615 3.2173283799 -0.1518062767

H -3.6915342554 4.0961292913 0.9932037002

H -4.7498606828 2.7854993197 1.5609164077

C 3.3133125931 -3.106619789 1.1611636465

C 4.6485956609 -2.6769310005 1.0394759719

H 5.9283033565 -1.0727872635 0.4241034045

H 5.461376899 -3.3281033852 1.3425327971

H 3.1000222219 -4.0937819791 1.5591018327

H 1.2592815207 -2.6684726107 0.8845225916

17E

C 2.87741 -1.57753 0.04267

C 4.22831 -1.14648 -0.05507

C 4.51931 0.21812 -0.42636

C 3.55436 1.12455 -0.68763

C 2.13991 0.7806 -0.60003

C 1.80837 -0.61206 -0.24382

C 0.48178 -0.98886 -0.20618

N -0.57389 -0.17515 -0.41266

C -1.90192 -0.59616 -0.47766

C -2.98055 0.31629 -0.28691

C -4.29244 -0.18445 -0.33212

C -4.56989 -1.52346 -0.56302

C -3.50818 -2.40142 -0.78096

C -2.20078 -1.94237 -0.75016

O 1.26737 1.63683 -0.81966

H -0.35544 0.82852 -0.51016

C -2.75416 1.7717 -0.04963

O -1.64099 2.26675 -0.10918

C -3.94695 2.66383 0.26468

C 2.65355 -2.91946 0.41204

C 5.27965 -2.04217 0.20703

H 5.56757 0.50397 -0.48796

H 3.77991 2.14943 -0.96212

H 0.22677 -2.01426 0.03157

H -5.11337 0.50524 -0.183

H -5.59467 -1.8765 -0.58914

H -3.69772 -3.44818 -0.9964

H -1.3986 -2.63205 -0.98078

H -4.6325 2.71754 -0.58835

H -3.56829 3.66365 0.47792

H -4.51471 2.294 1.12412

C 3.70418 -3.79016 0.66339

C 5.03031 -3.35592 0.56225

H 6.30143 -1.68125 0.12632

H 5.85013 -4.03808 0.76098

H 3.48939 -4.81643 0.94529

H 1.64318 -3.30066 0.5119

18F

C 2.61785 -0.75954 0.43586

C 3.99852 -0.52611 0.28598

C 4.41439 0.57214 -0.53931

C 3.44036 1.38075 -1.16446

C 2.09016 1.13891 -1.00408

C 1.66371 0.03202 -0.18616

C 0.25693 -0.26415 0.01331

N -0.67522 0.4132 -0.55544

C -2.02387 0.07753 -0.40969

C -2.99221 1.08033 -0.14196

C -4.34311 0.7122 -0.10643

C -4.7527 -0.60044 -0.31417

C -3.79774 -1.57811 -0.58257

C -2.45004 -1.24011 -0.6357

O 1.20349 1.93951 -1.61001

H 0.29979 1.63804 -1.34381

C -2.57991 2.49209 0.1323

O -1.43569 2.77595 0.43114

C -3.62798 3.59201 0.02537

H 2.28897 -1.58956 1.05744

C 4.98123 -1.33286 0.92047

C 5.80804 0.80762 -0.69249

H 3.74316 2.2191 -1.78325

H 0.01996 -1.08848 0.69898

H -5.09496 1.46627 0.09929

H -5.80661 -0.85512 -0.27644

H -4.10225 -2.60464 -0.76284

H -1.70722 -1.98916 -0.89035

H -4.15913 3.55103 -0.93097

H -3.11828 4.55015 0.12745

H -4.37489 3.50398 0.82234

C 6.3185 -1.07462 0.7519

C 6.73163 0.00734 -0.06532

H 4.65247 -2.16053 1.54325

H 7.06333 -1.6942 1.24074

H 7.79204 0.20189 -0.19505

H 6.13073 1.63659 -1.31567

18E

see text

19F

C 2.81499 -1.44847 0.50886

C 4.13947 -1.1275 0.42807

C 4.54508 0.09086 -0.19211

C 3.55902 0.9759 -0.72427

C 2.17668 0.61667 -0.63115

C 1.80425 -0.59593 -0.0224

C 0.41668 -0.97434 0.07667

N -0.53423 -0.26101 -0.42898

C -1.85871 -0.70054 -0.3938

C -2.92416 0.18788 -0.08609

C -4.23662 -0.30667 -0.13046

C -4.51901 -1.62681 -0.46019

C -3.46953 -2.48764 -0.77551

C -2.16011 -2.02521 -0.74904

O 1.27873 1.46179 -1.12779

H 0.37282 1.07662 -0.94945

C -2.67308 1.61329 0.29887

O -1.55514 2.04501 0.50619

C -3.87146 2.54717 0.43018

H 2.50341 -2.37619 0.98214

H 4.89826 -1.78864 0.83427

C 5.90687 0.46242 -0.29944

C 3.96017 2.18905 -1.333

H 0.19393 -1.89882 0.62528

H -5.05566 0.36063 0.10771

H -5.54507 -1.97784 -0.47863

H -3.66887 -3.51759 -1.05485

H -1.34606 -2.68099 -1.03874

H -4.47152 2.56553 -0.48577

H -3.49396 3.54826 0.64065

H -4.52967 2.23638 1.24898

C 6.27399 1.64697 -0.89871

C 5.29371 2.5197 -1.41882

H 3.19345 2.84594 -1.72627

H 5.59493 3.45161 -1.88639

H 6.66344 -0.20657 0.10103

H 7.32443 1.91225 -0.97247

19E

C 2.864068656 -1.5767029049 0.2214815508

C 4.1748074314 -1.2514559988 0.1405637296

C 4.5904021508 0.0631179436 -0.2947485728

C 3.6173191616 1.0332402737 -0.638820818

C 2.1750990417 0.7196950194 -0.5549401963

C 1.8215092835 -0.6398990102 -0.1191082212

C 0.5034090384 -1.0383591779 -0.039180949

N -0.5714836634 -0.266312469 -0.294294118

C -1.8934664853 -0.7077187344 -0.3019027862

C -2.9743576763 0.21230935 -0.1796026778

C -4.2835267372 -0.2955940227 -0.1667264491

C -4.5556264092 -1.6502934632 -0.2772930488

C -3.4913874874 -2.5398669082 -0.4215761194

C -2.1853130931 -2.0761711325 -0.4416070153

O 1.3132346565 1.5629828726 -0.8371024388

H -0.3873647322 0.7326984092 -0.4622324549

C -2.7534270082 1.6810354269 -0.0691918469

O -1.6461400256 2.1775940133 -0.2039129713

C -3.9404866486 2.5892748089 0.211723579

H 2.5676672106 -2.5710549595 0.5474605361

H 4.941585101 -1.9748486808 0.3989653515

C 5.9495870391 0.4144211869 -0.3887130524

C 4.0161653259 2.3085619193 -1.060152284

H 0.2957237652 -2.0542056051 0.2828842481

H -5.1105943068 0.3968077083 -0.0713961015

H -5.579064854 -2.0071794154 -0.2667631879

H -3.6784982247 -3.6025711268 -0.5373784816

H -1.3810541918 -2.7815360259 -0.6076385135

H -4.6620687021 2.5622619871 -0.6117083901

H -3.5634607437 3.6062241763 0.3191911038

H -4.4684981639 2.2944797884 1.1239162244

C 6.3289120783 1.679779036 -0.8087262388

C 5.3603798481 2.634547435 -1.1471565496

H 3.2398922834 3.0223628621 -1.3118149681

H 5.66300446 3.6236828776 -1.4748067678

H 6.7033704355 -0.3224496403 -0.1265725939

H 7.3829821863 1.9315421806 -0.8748685103

20F

C -1.81501 1.40272 0.1663

C -3.16652 0.95229 0.19609

C -3.46098 -0.45798 -0.03881

C -2.40142 -1.3624 -0.30182

C -1.03839 -0.88781 -0.32334

C -0.73635 0.45671 -0.08514

C 0.64728 0.86053 -0.051

N 1.61449 0.05598 -0.36102

C 2.93857 0.49394 -0.36953

C 3.98884 -0.31918 0.13809

C 5.30334 0.16405 0.05347

C 5.60492 1.39773 -0.50944

C 4.57269 2.18124 -1.02021

C 3.26104 1.73017 -0.95476

O -0.10861 -1.79882 -0.55629

H 0.79228 -1.34822 -0.49742

C 3.72646 -1.65293 0.76558

O 2.60345 -2.09574 0.91625

C 4.91799 -2.48399 1.22753

C -1.57023 2.78048 0.36872

C -4.18945 1.89079 0.44514

C -4.77148 -0.98239 -0.02283

C -2.66556 -2.72817 -0.5351

H 0.88327 1.87097 0.29059

H 6.11311 -0.44045 0.44284

H 6.63338 1.73783 -0.55862

H 4.78826 3.13992 -1.48135

H 2.4624 2.31804 -1.39371

H 5.60831 -2.69185 0.40364

H 4.53405 -3.42362 1.62446

H 5.48427 -1.96785 2.01

C -5.0167 -2.32255 -0.25428

C -3.95845 -3.20693 -0.51313

H -1.82812 -3.38613 -0.72873

H -4.15611 -4.25831 -0.6931

H -5.61293 -0.33078 0.17501

H -6.03771 -2.69044 -0.23404

C -2.59339 3.67534 0.61159

C -3.91907 3.22826 0.65468

H -0.55854 3.16332 0.32244

H -2.36469 4.72537 0.76339

H -4.72905 3.9246 0.84375

H -5.22107 1.56275 0.47152

20E

C 1.85856 1.35693 -0.32546

C 3.20166 0.93504 -0.13845

C 3.49279 -0.47622 0.16838

C 2.45191 -1.42978 0.15921

C 1.04288 -1.03485 -0.06425

C 0.75755 0.39761 -0.16962

C -0.54374 0.83148 -0.03812

N -1.64245 0.04853 0.02005

C -2.92335 0.49651 0.33192

C -4.07259 -0.26371 -0.0307

C -5.33962 0.25268 0.28526

C -5.5053 1.46381 0.93936

C -4.37304 2.18816 1.31115

C -3.10501 1.70876 1.0209

O 0.14971 -1.89033 -0.0976

H -1.51574 -0.9453 -0.2045

C -3.96321 -1.57485 -0.72819

O -2.88621 -2.12077 -0.91145

C -5.22927 -2.25734 -1.22275

C 1.62525 2.6982 -0.6865

C 4.23182 1.88095 -0.2821

C 4.79215 -0.93807 0.45227

C 2.71923 -2.78504 0.39798

H -0.73785 1.89513 0.02795

H -6.21873 -0.31733 0.01135

H -6.49862 1.83087 1.17076

H -4.47563 3.12495 1.84941

H -2.24087 2.25955 1.37058

H -5.88096 -2.53476 -0.38738

H -4.93419 -3.16038 -1.75693

H -5.80475 -1.60729 -1.88914

C 5.04522 -2.27944 0.69565

C 4.00711 -3.21618 0.6632

H 1.88051 -3.47085 0.37316

H 4.20867 -4.26546 0.85161

H 5.62069 -0.24222 0.49446

H 6.05957 -2.59938 0.91329

C 2.65705 3.61375 -0.81015

C 3.97461 3.20441 -0.60006

H 0.61648 3.02626 -0.91032

H 2.43769 4.63897 -1.0906

H 4.79437 3.90692 -0.70621

H 5.2626 1.57257 -0.15901

Compound 8


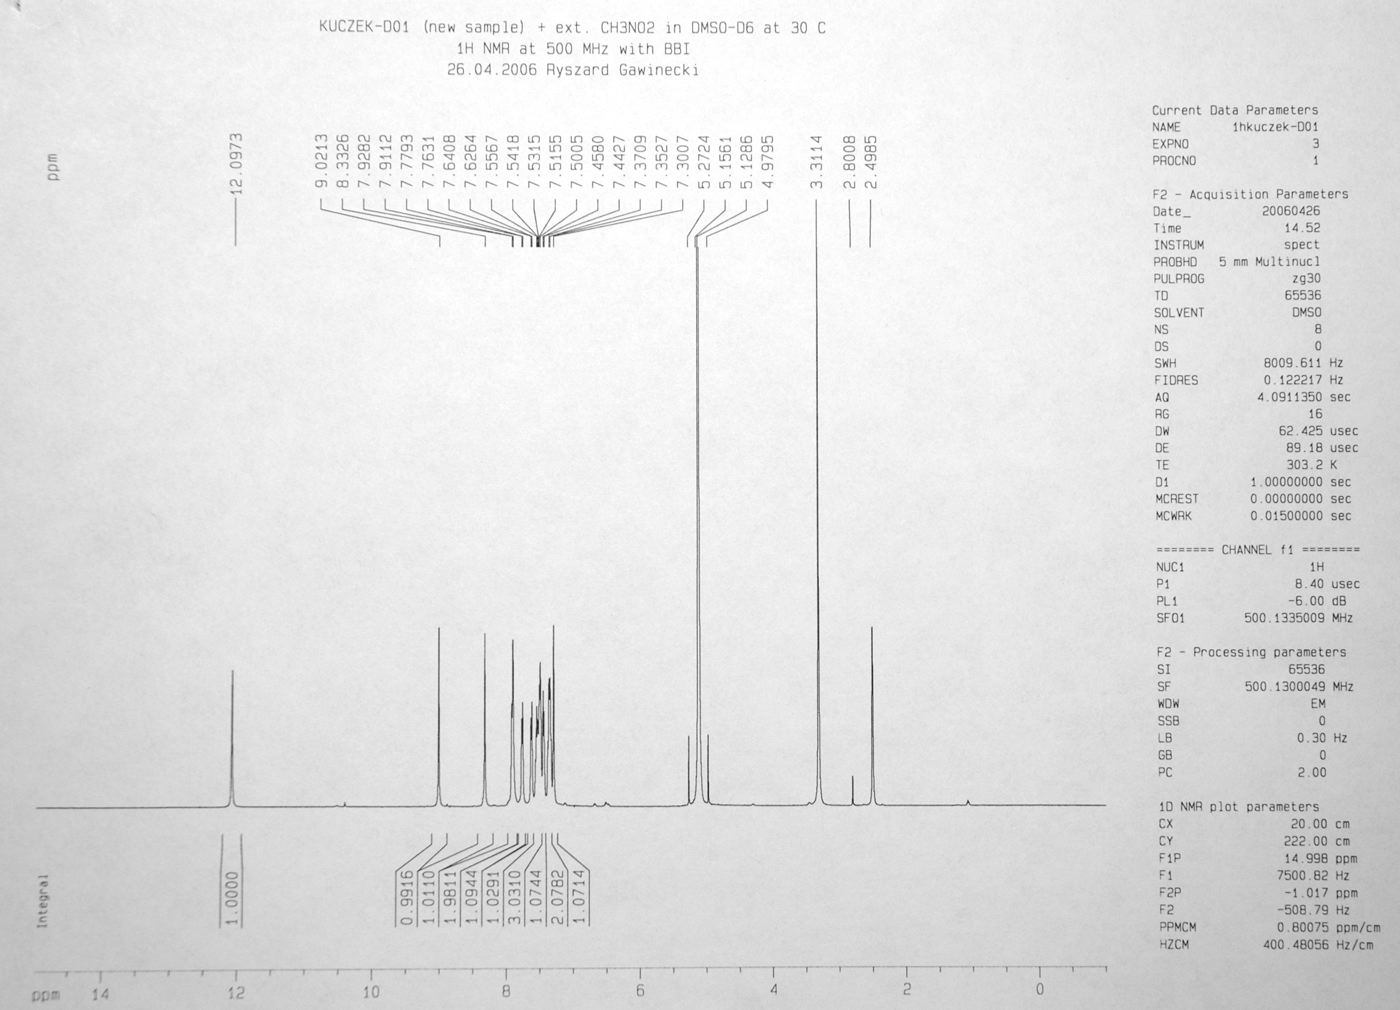


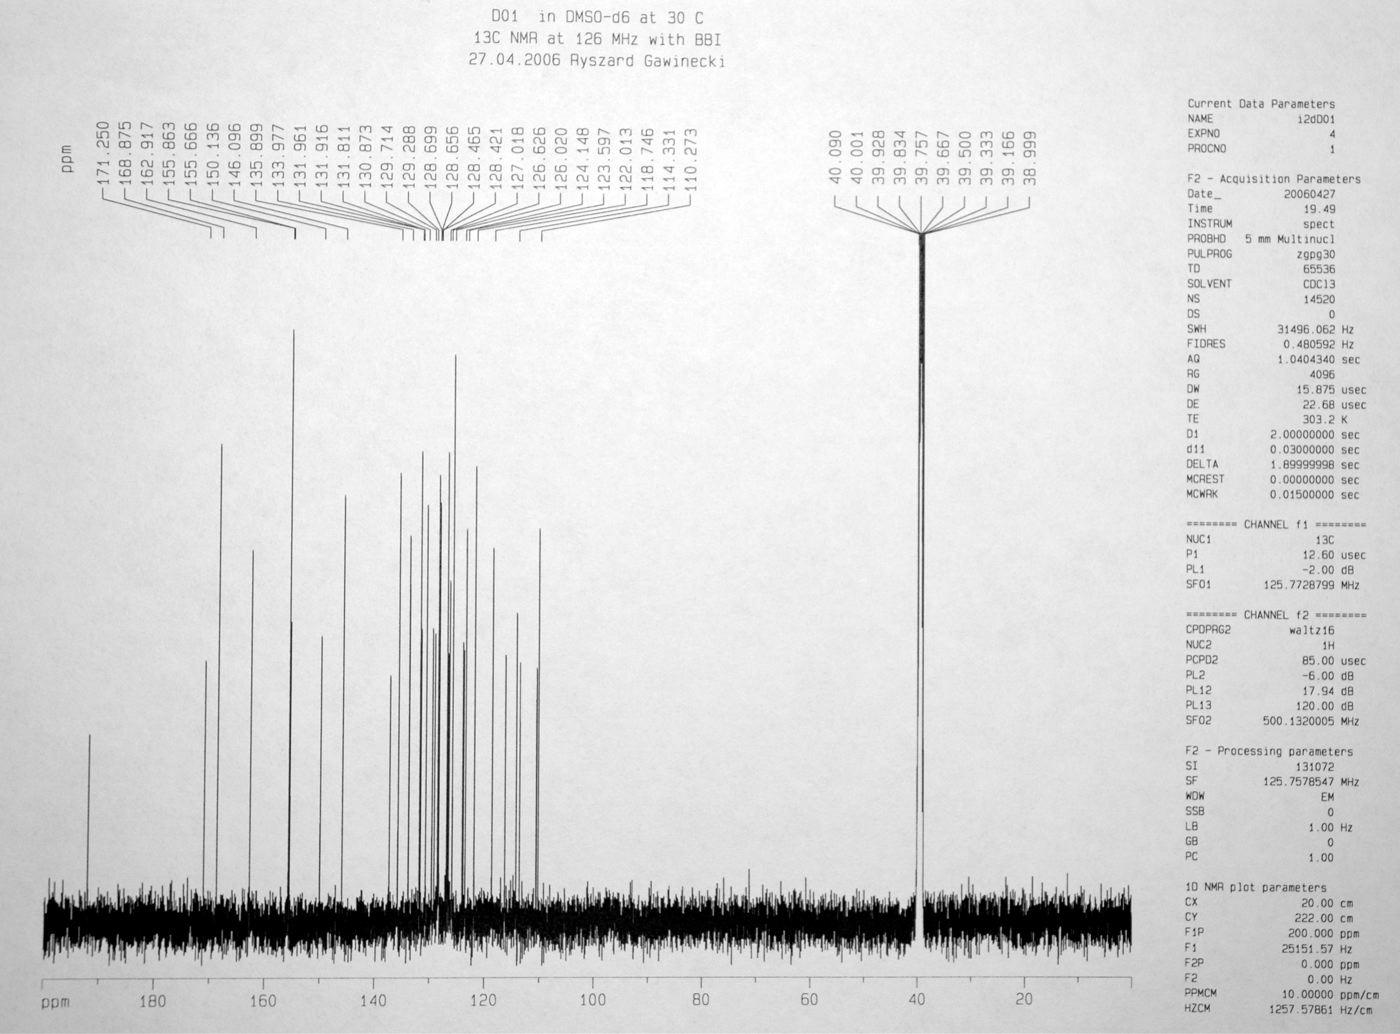


Compound 9


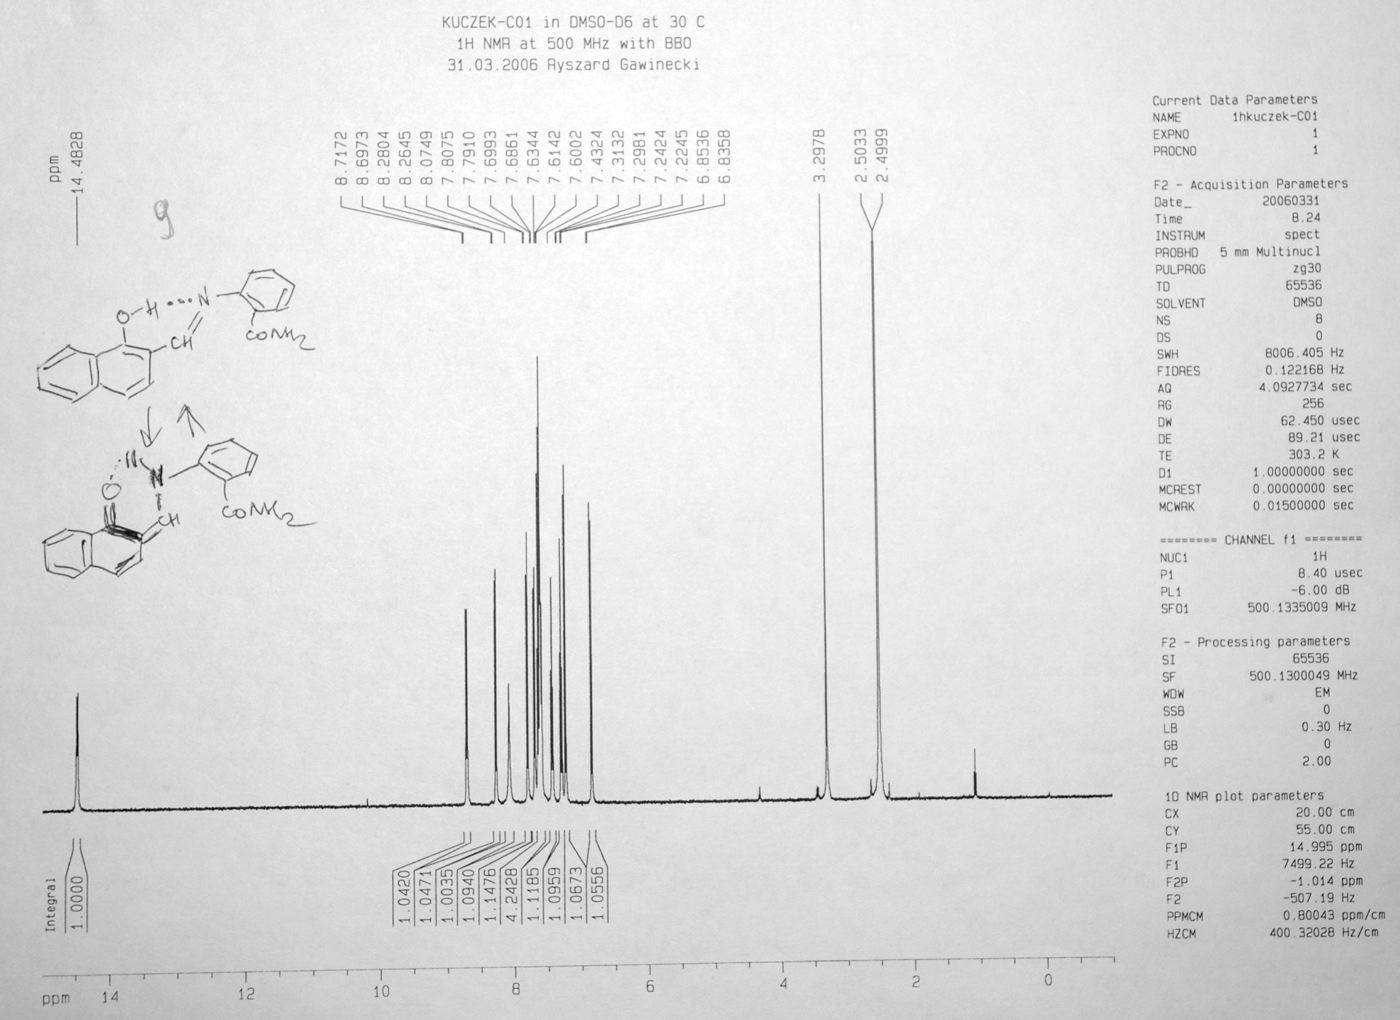


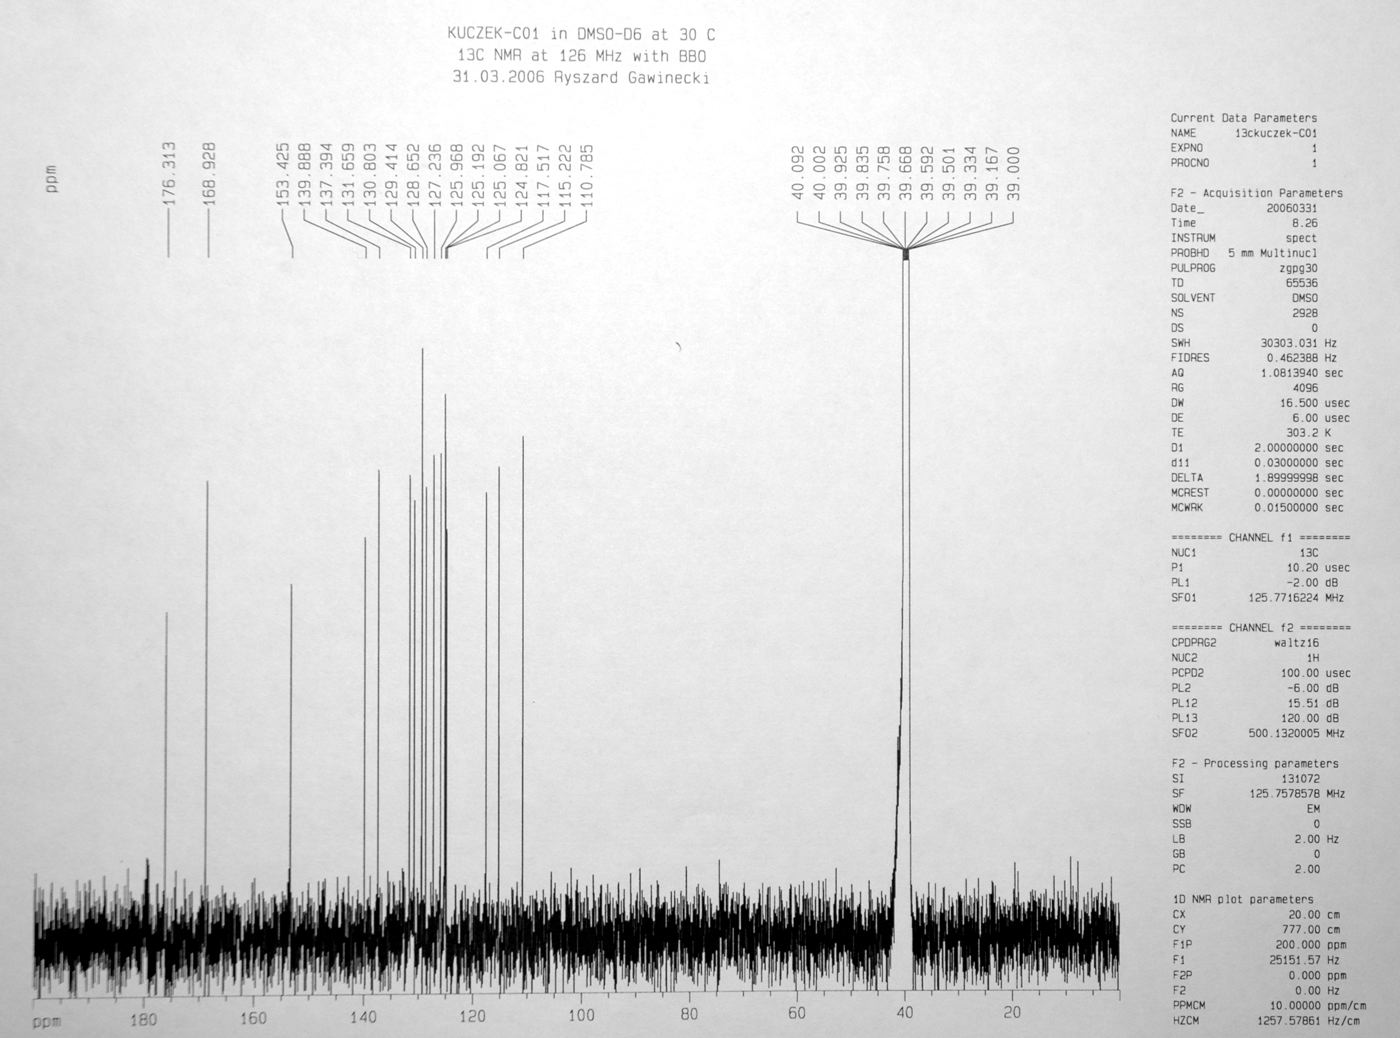


Compound 10


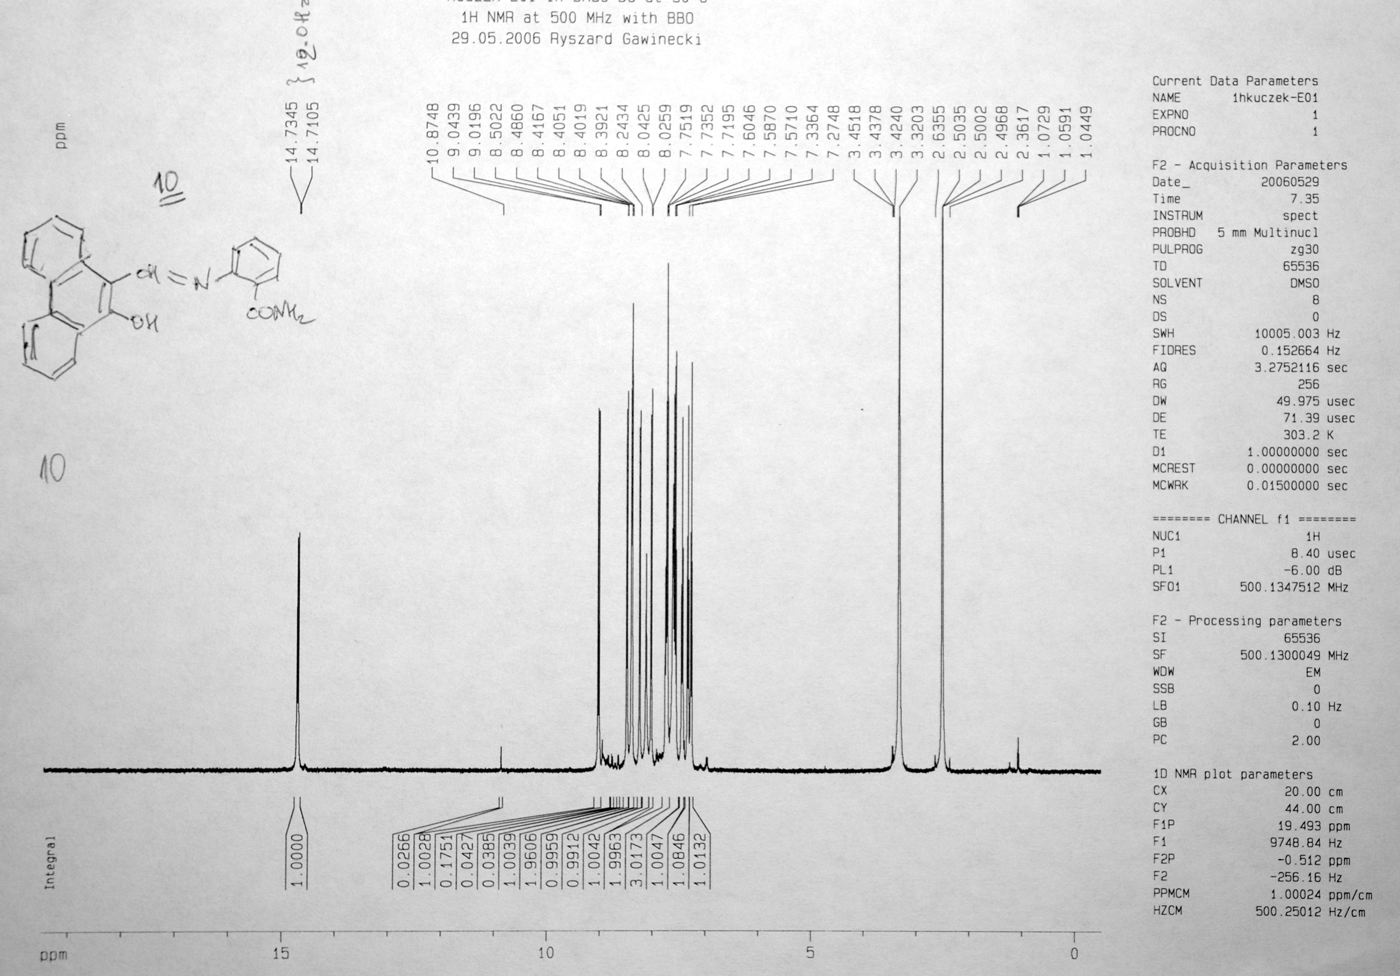

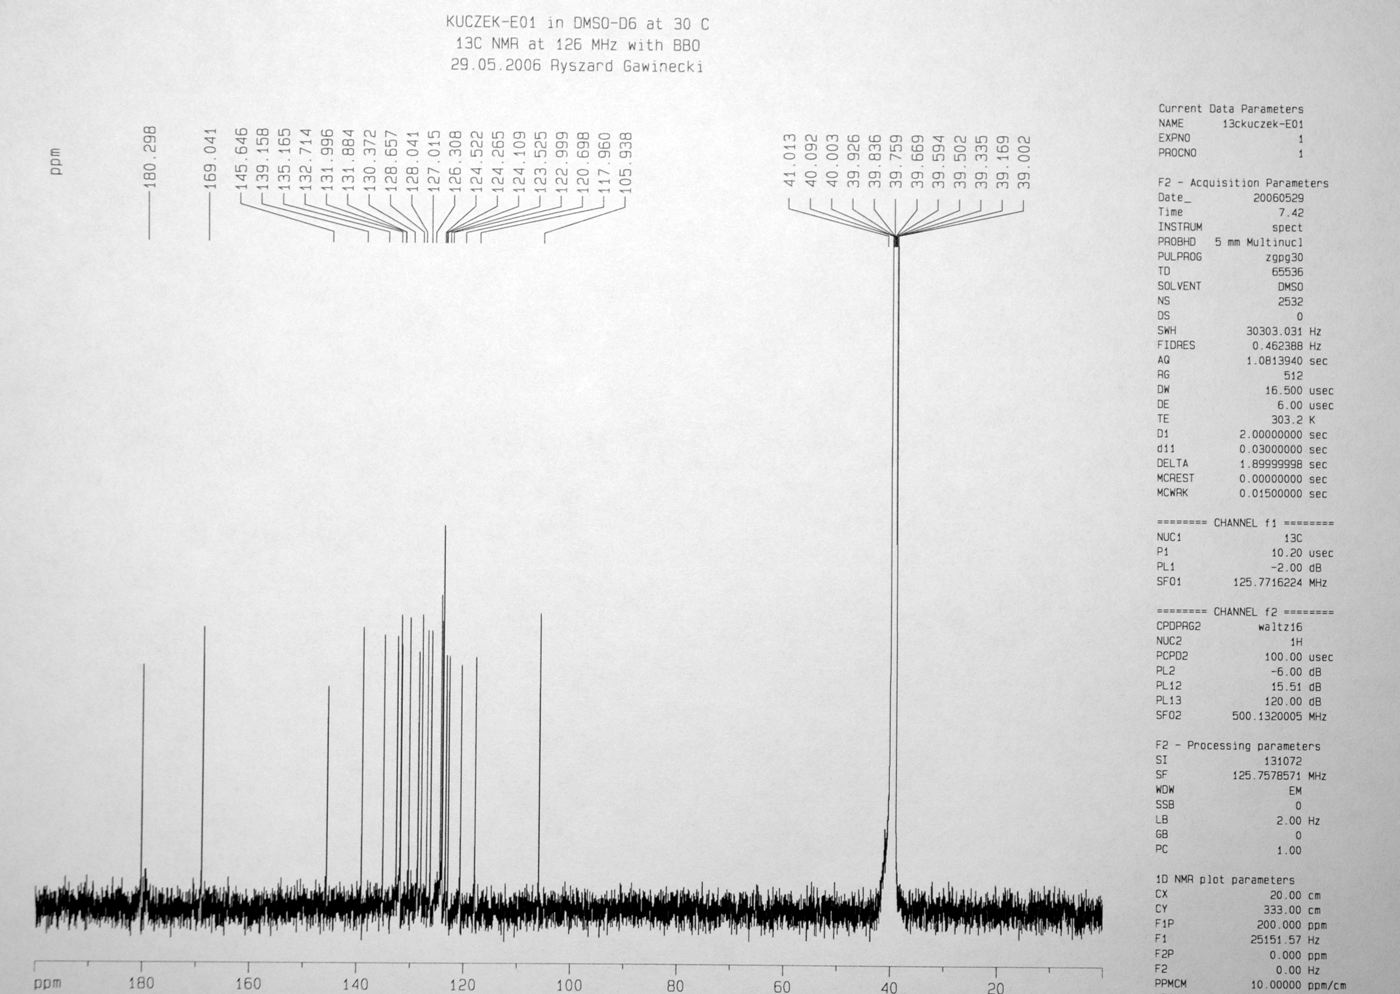


Compound 12


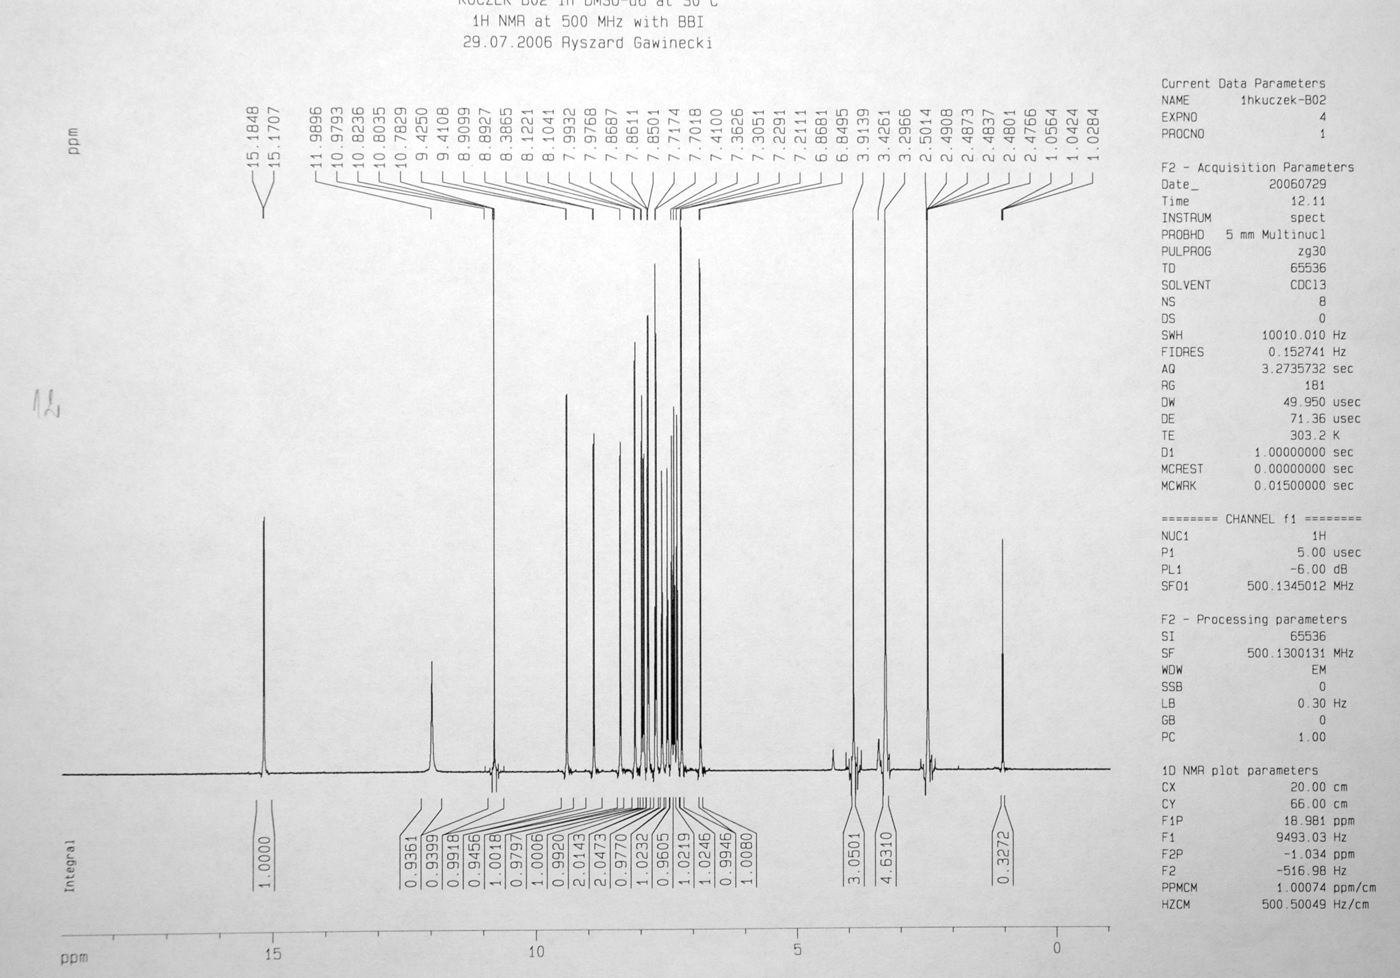


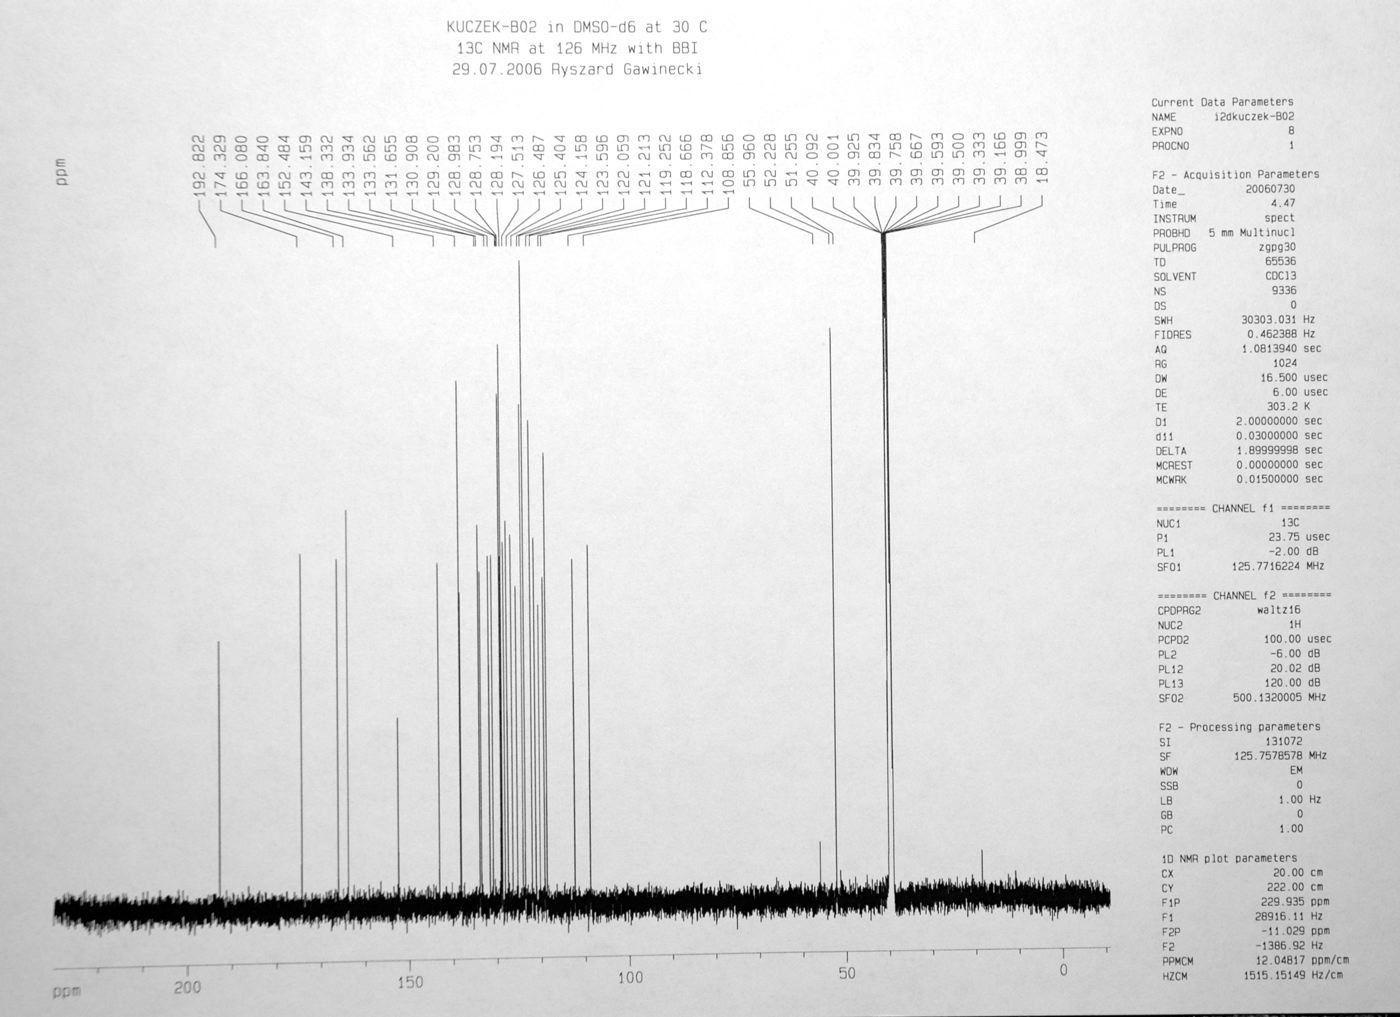


Compound 13


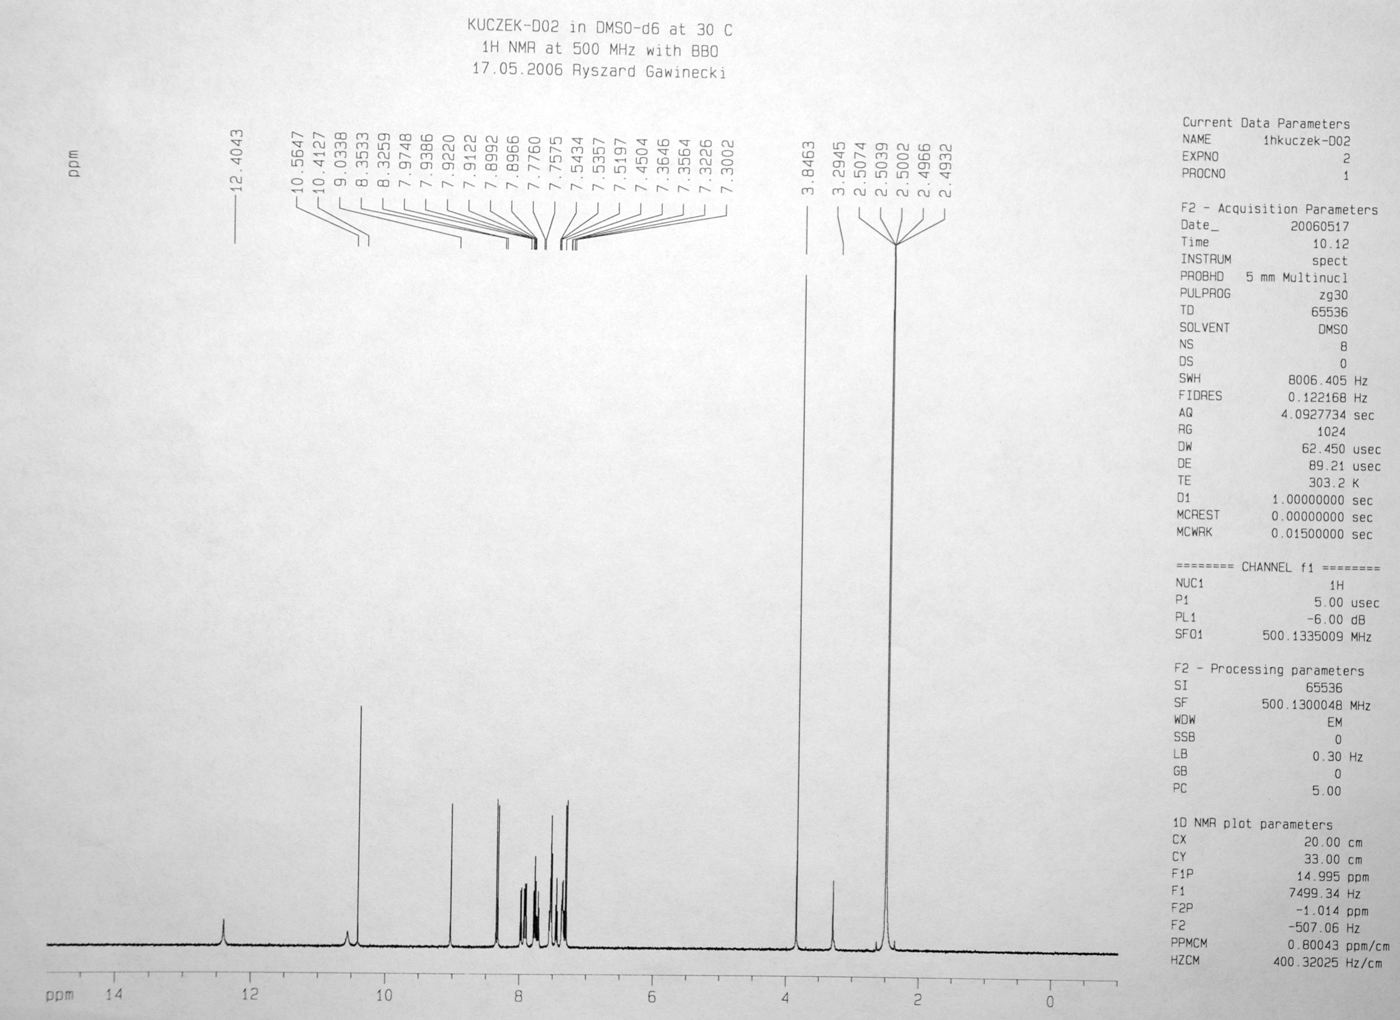

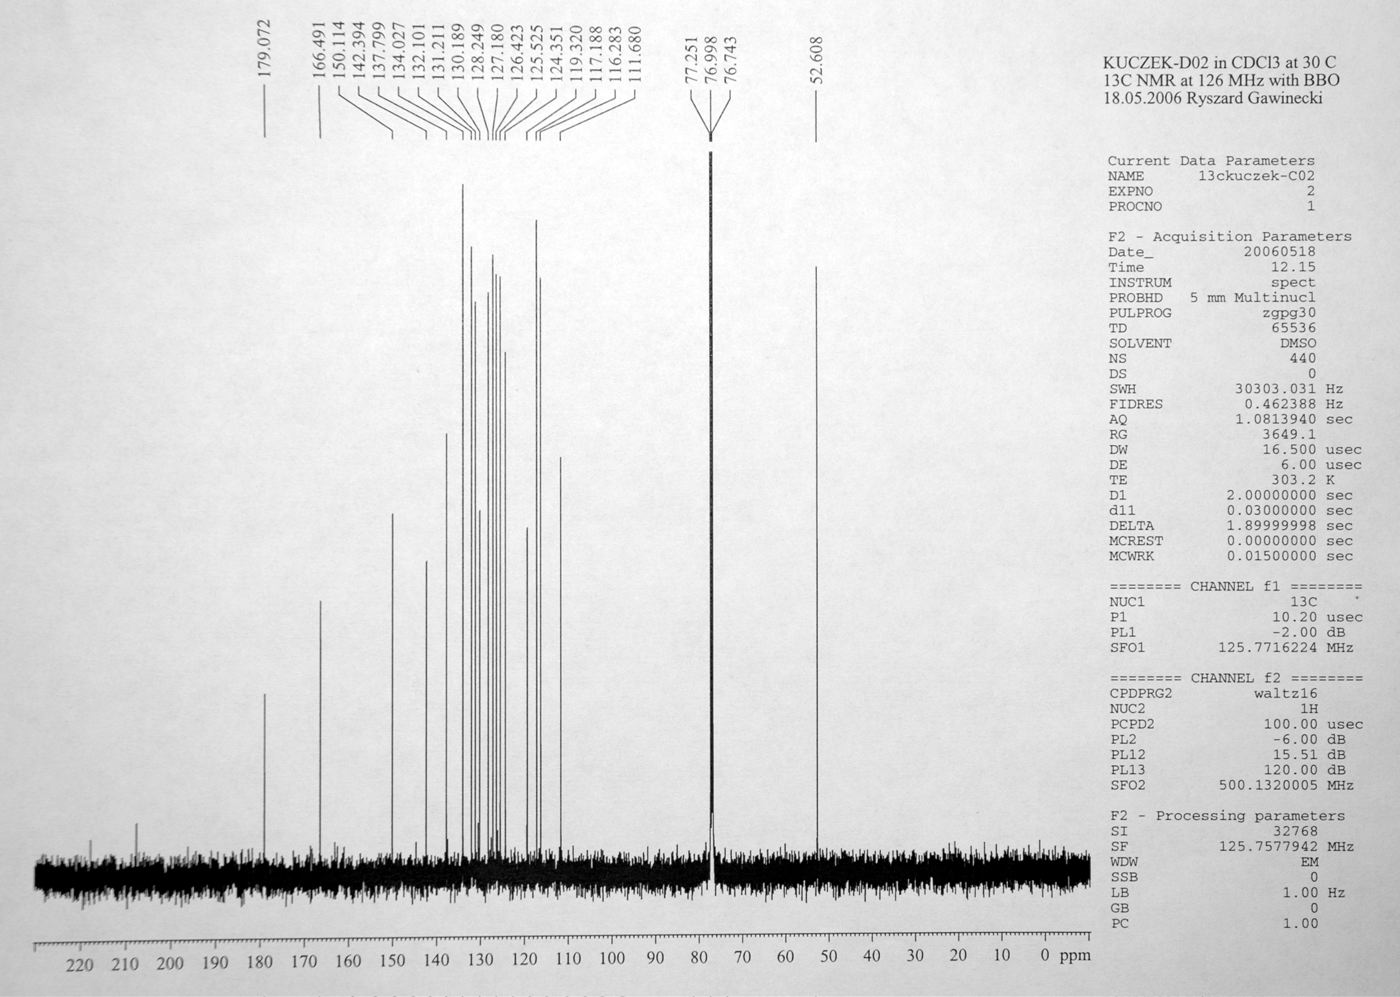


Compound 14


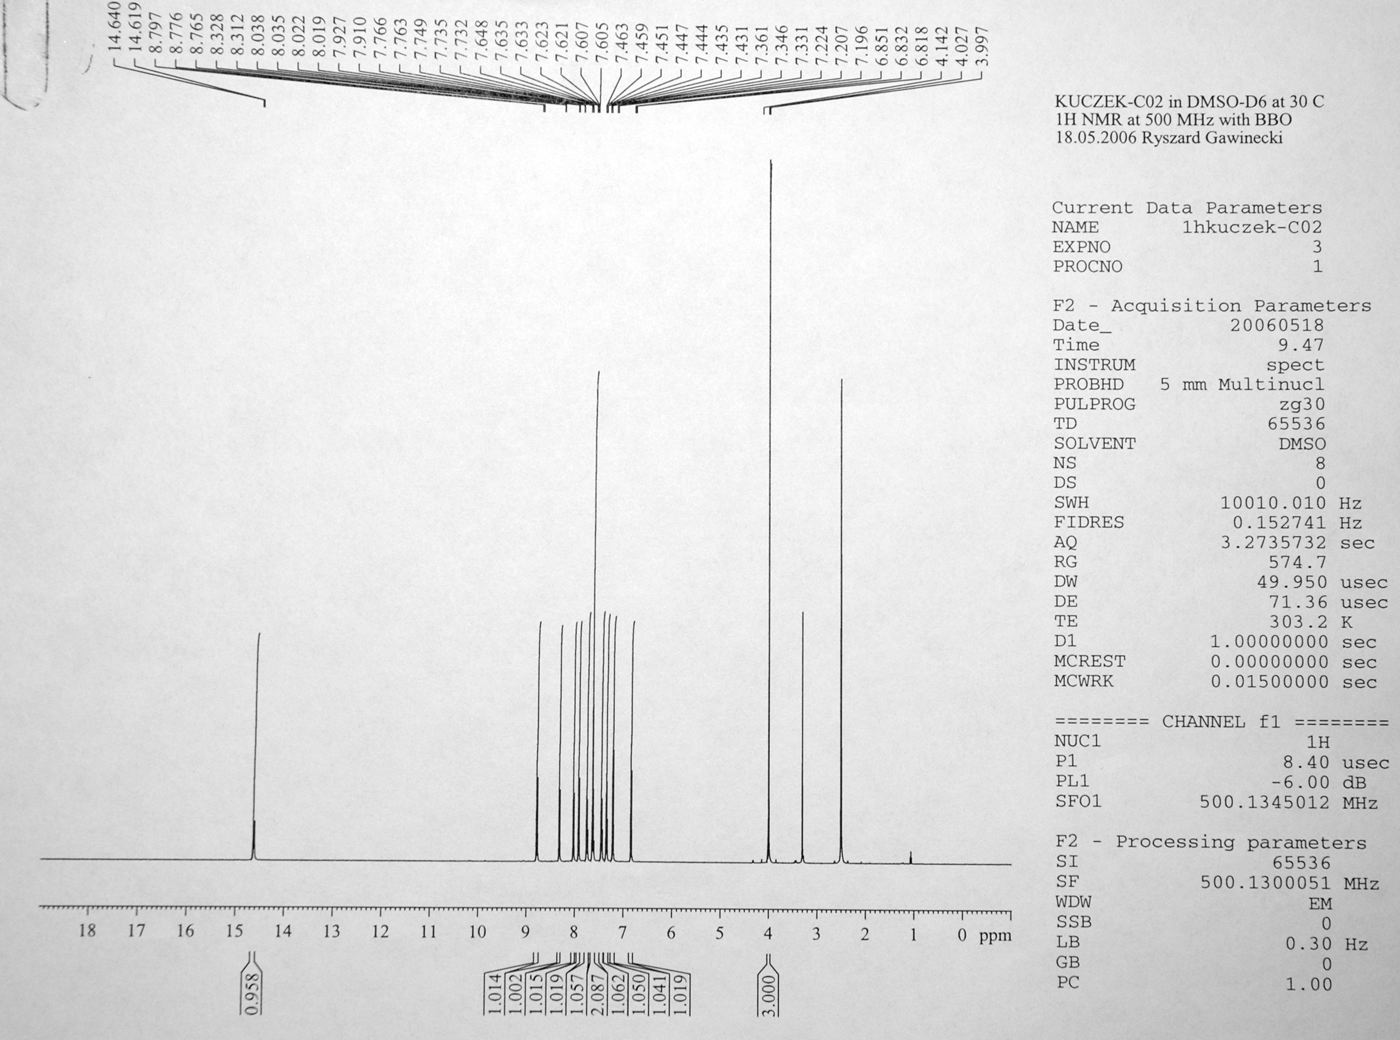


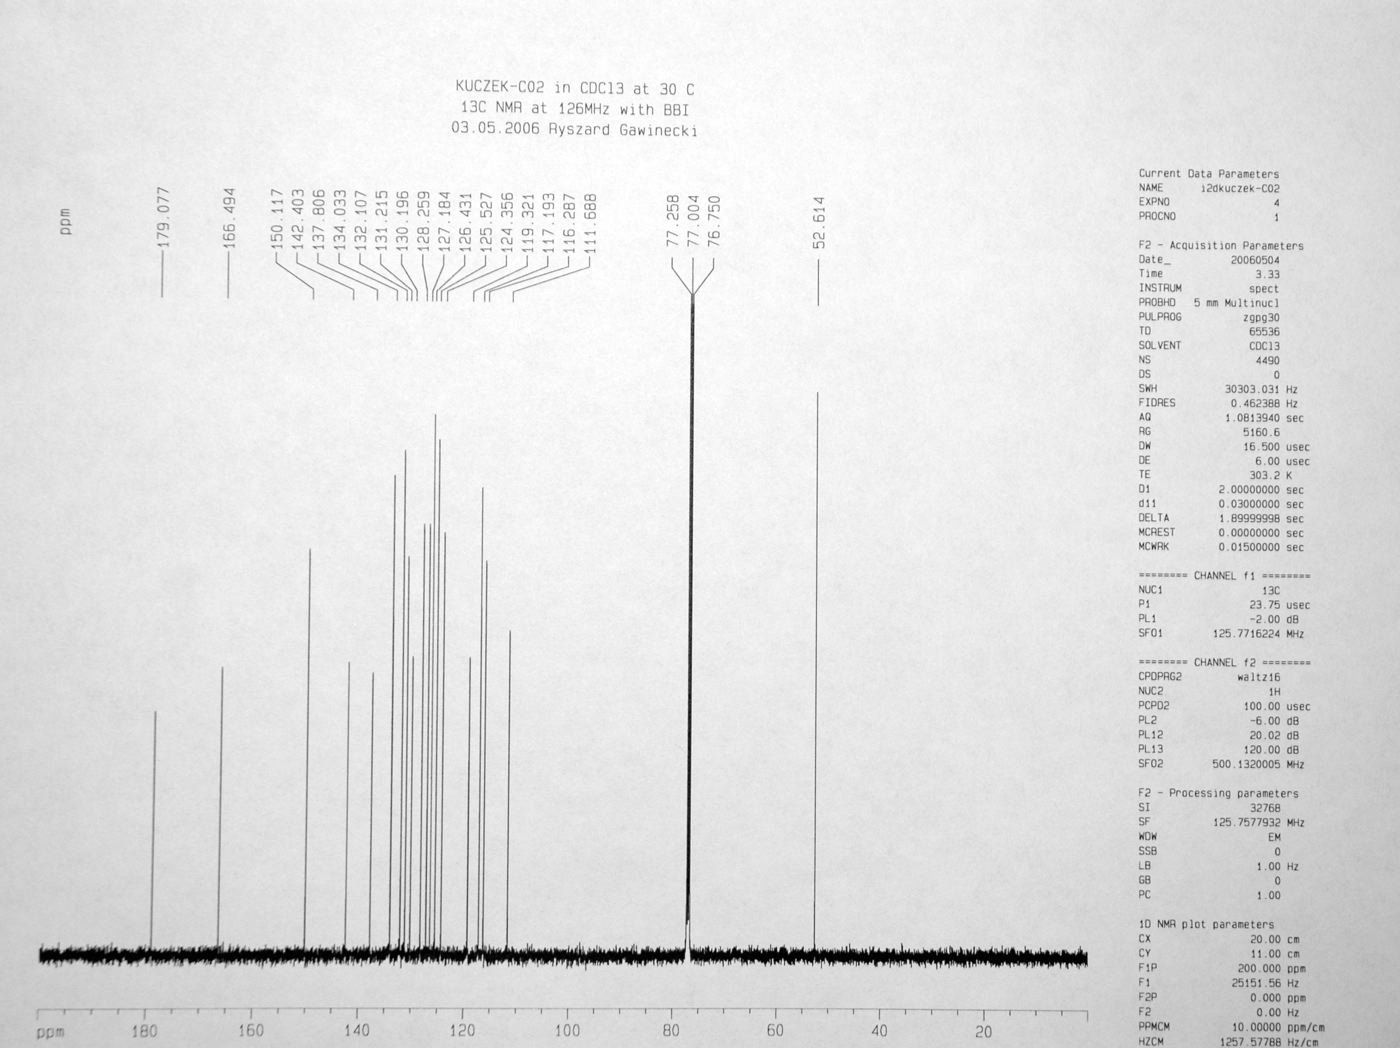


Compound 15


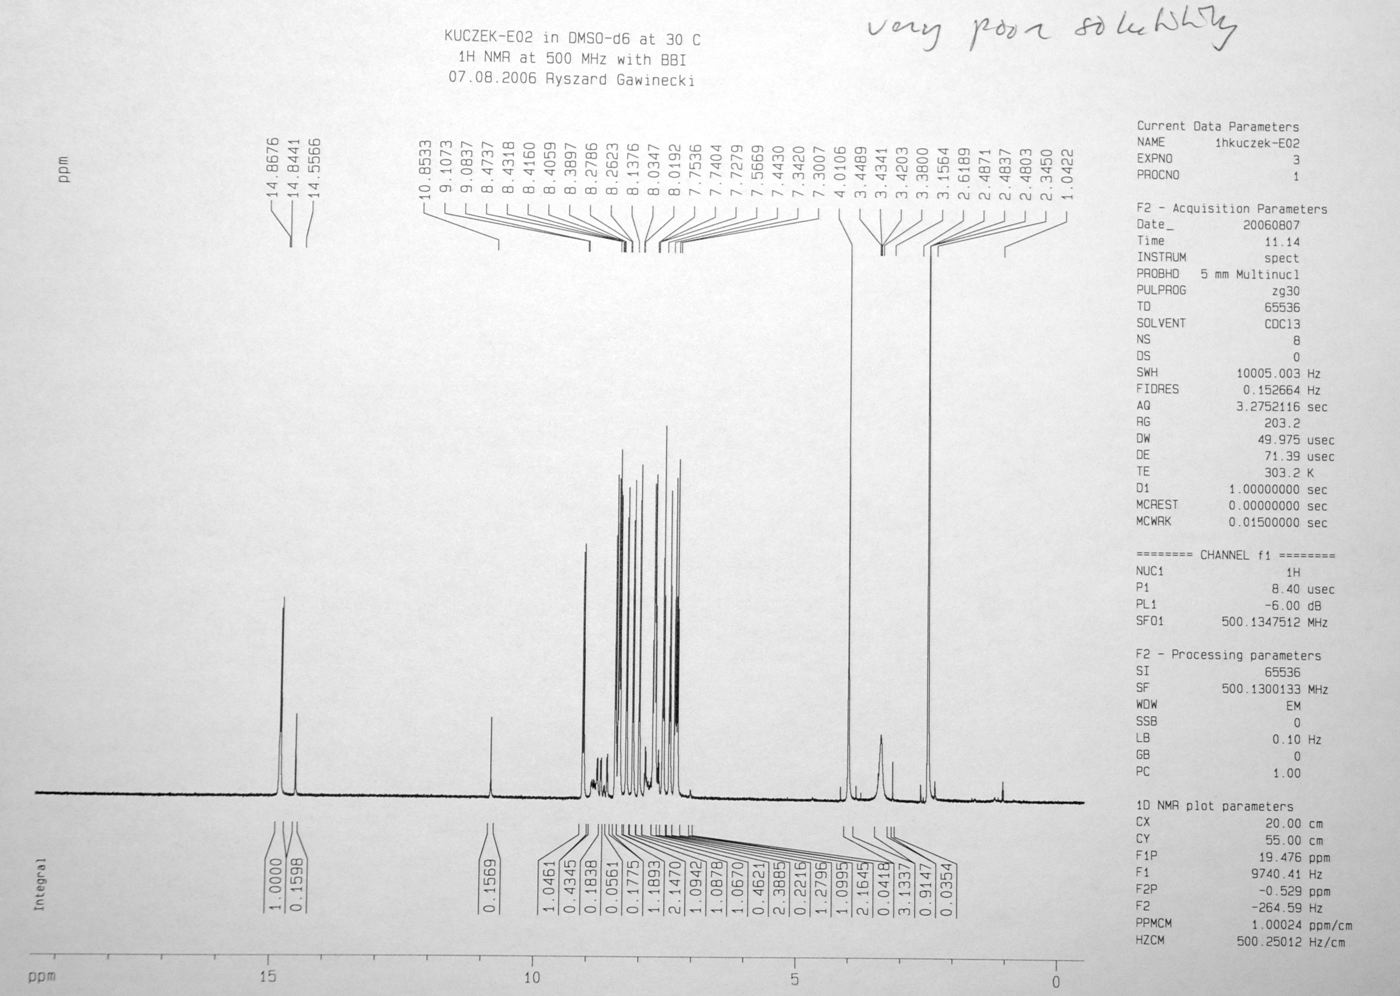


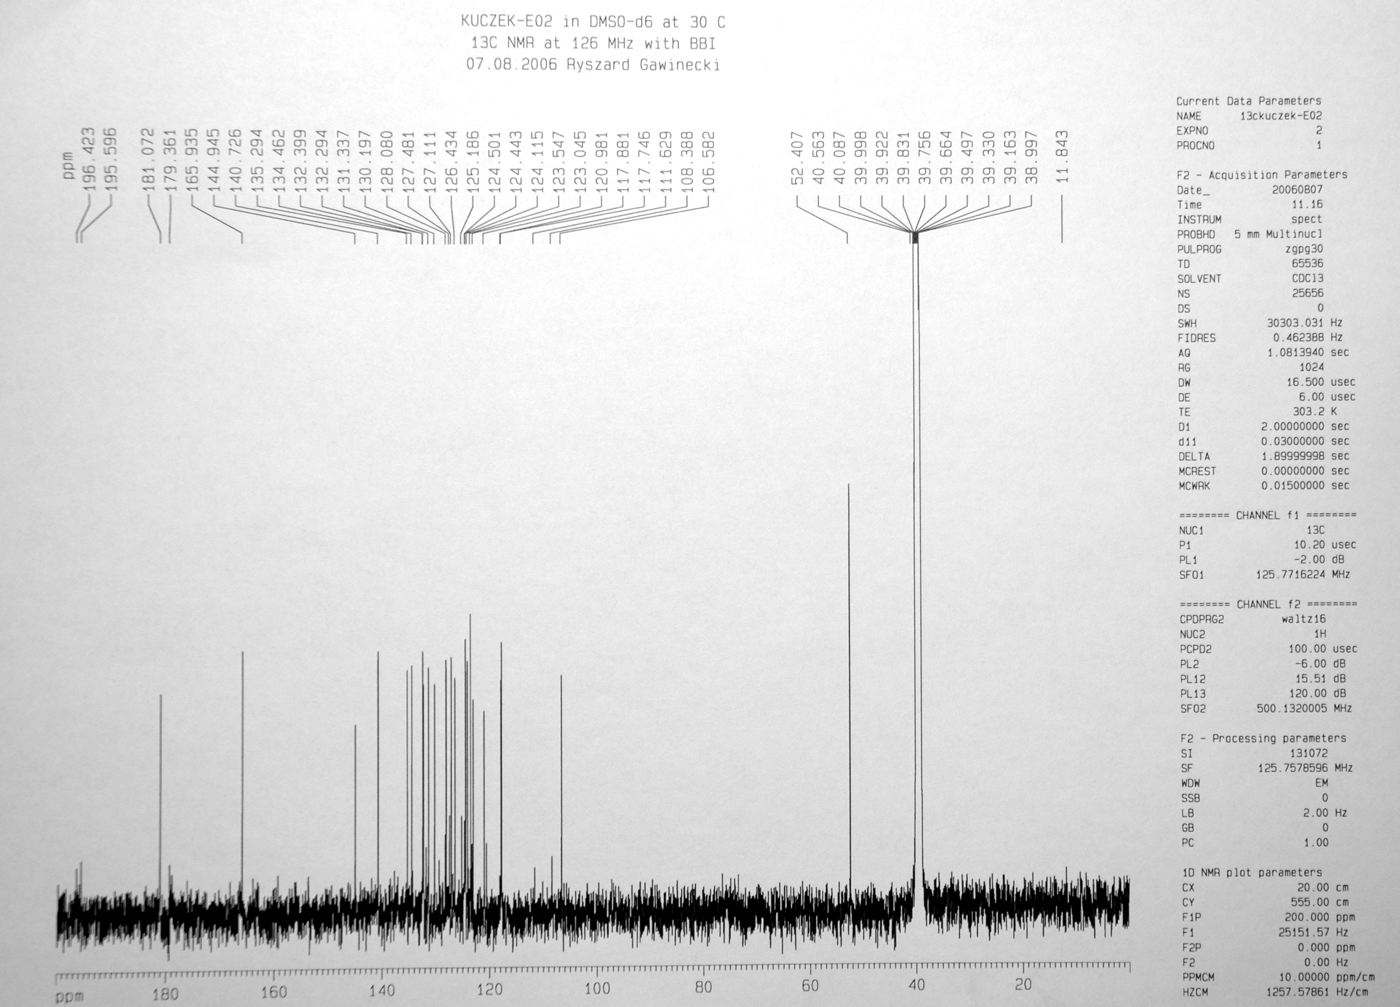


Compound 17


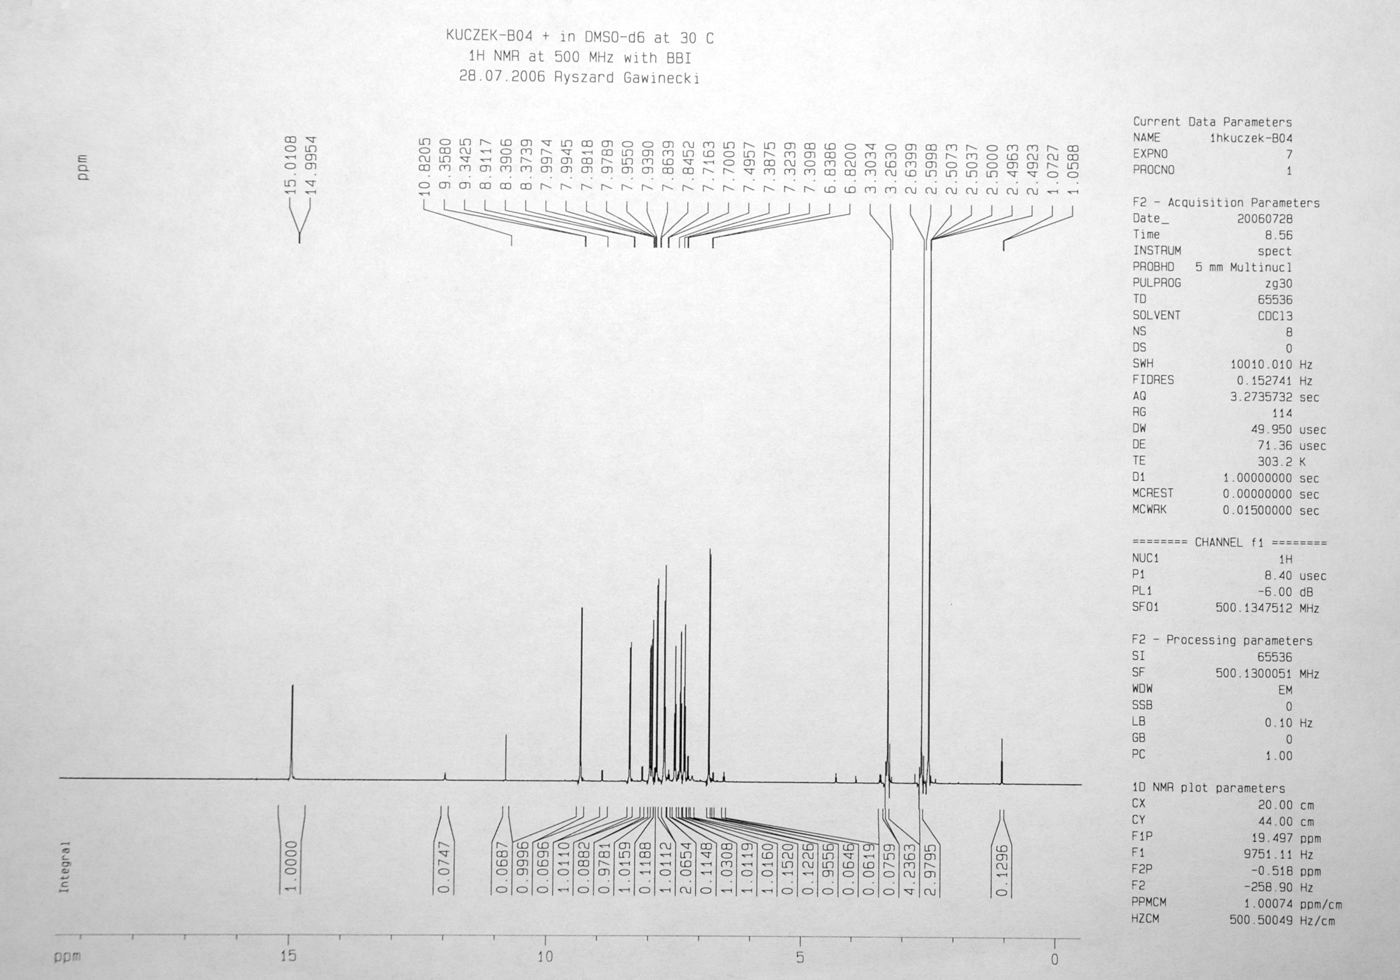


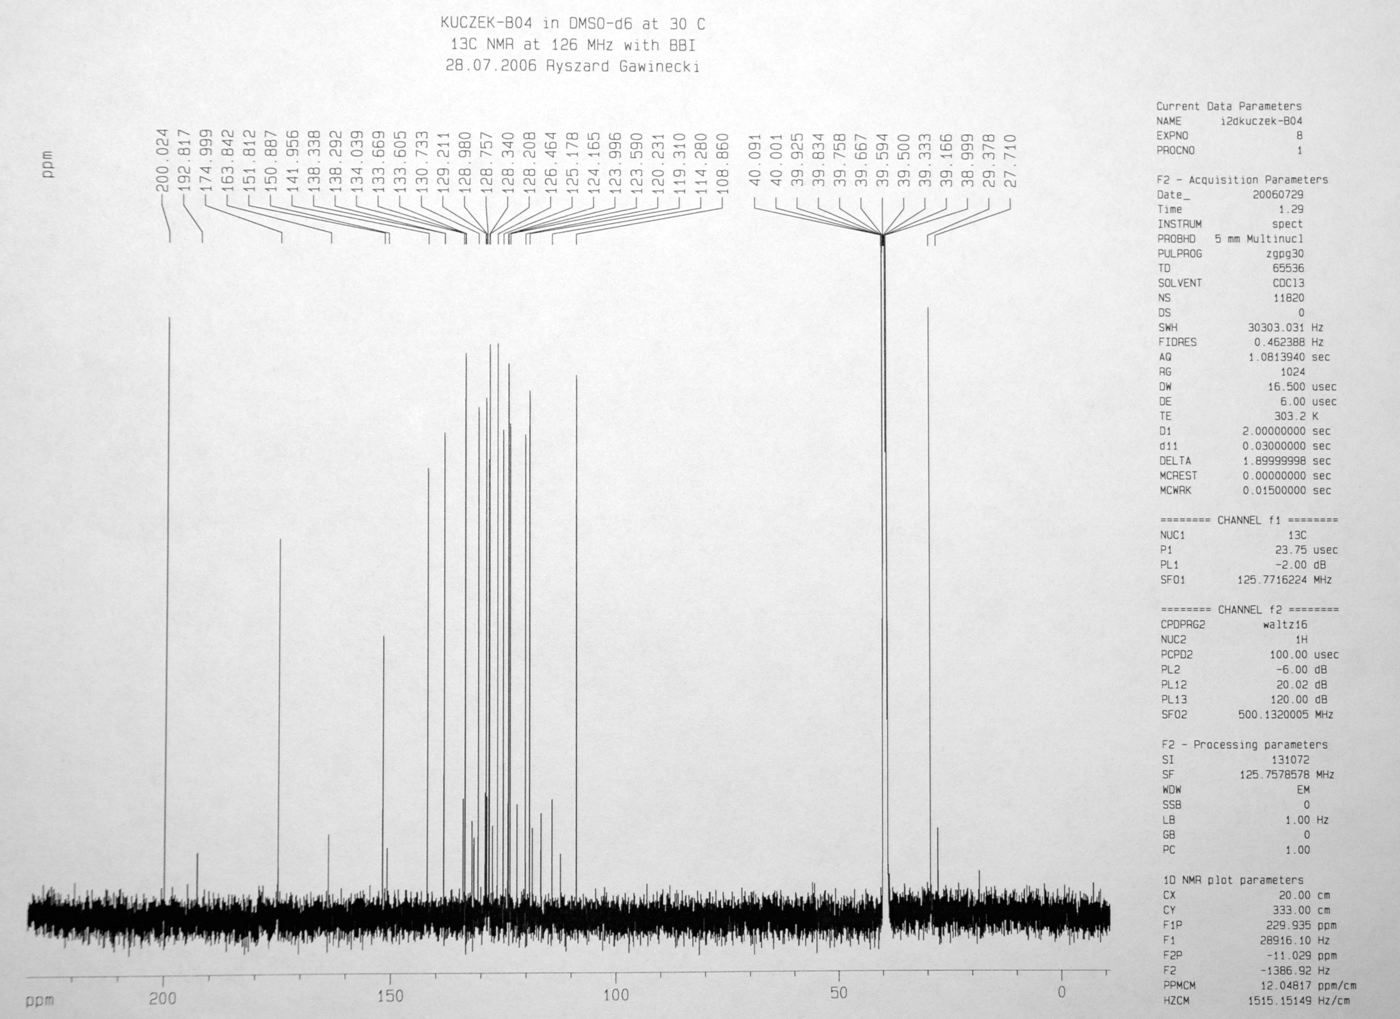


Compound 19


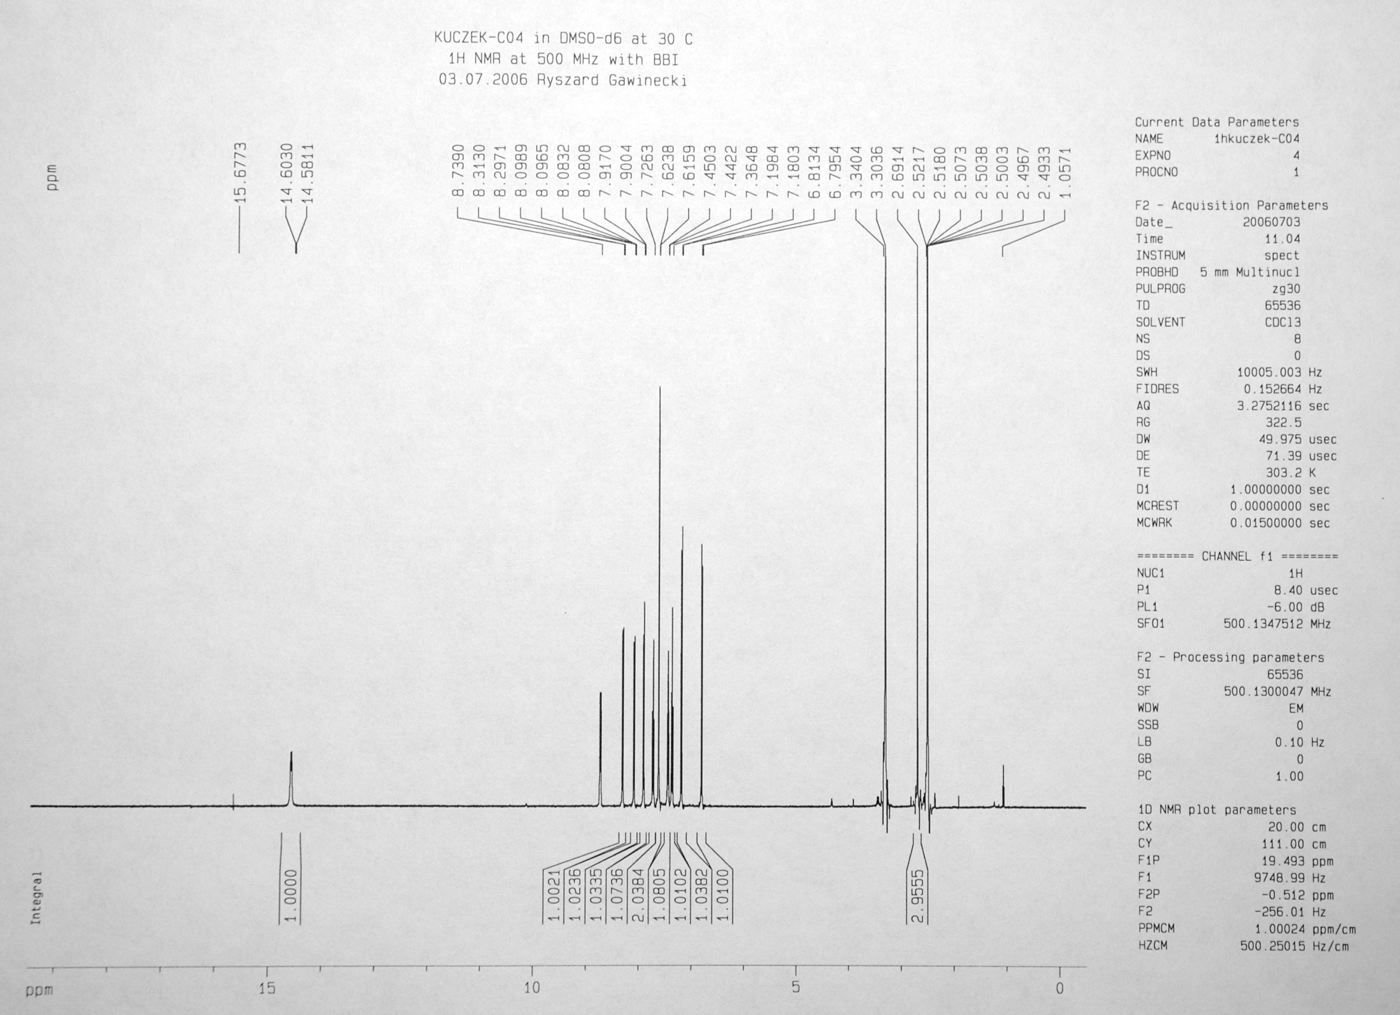


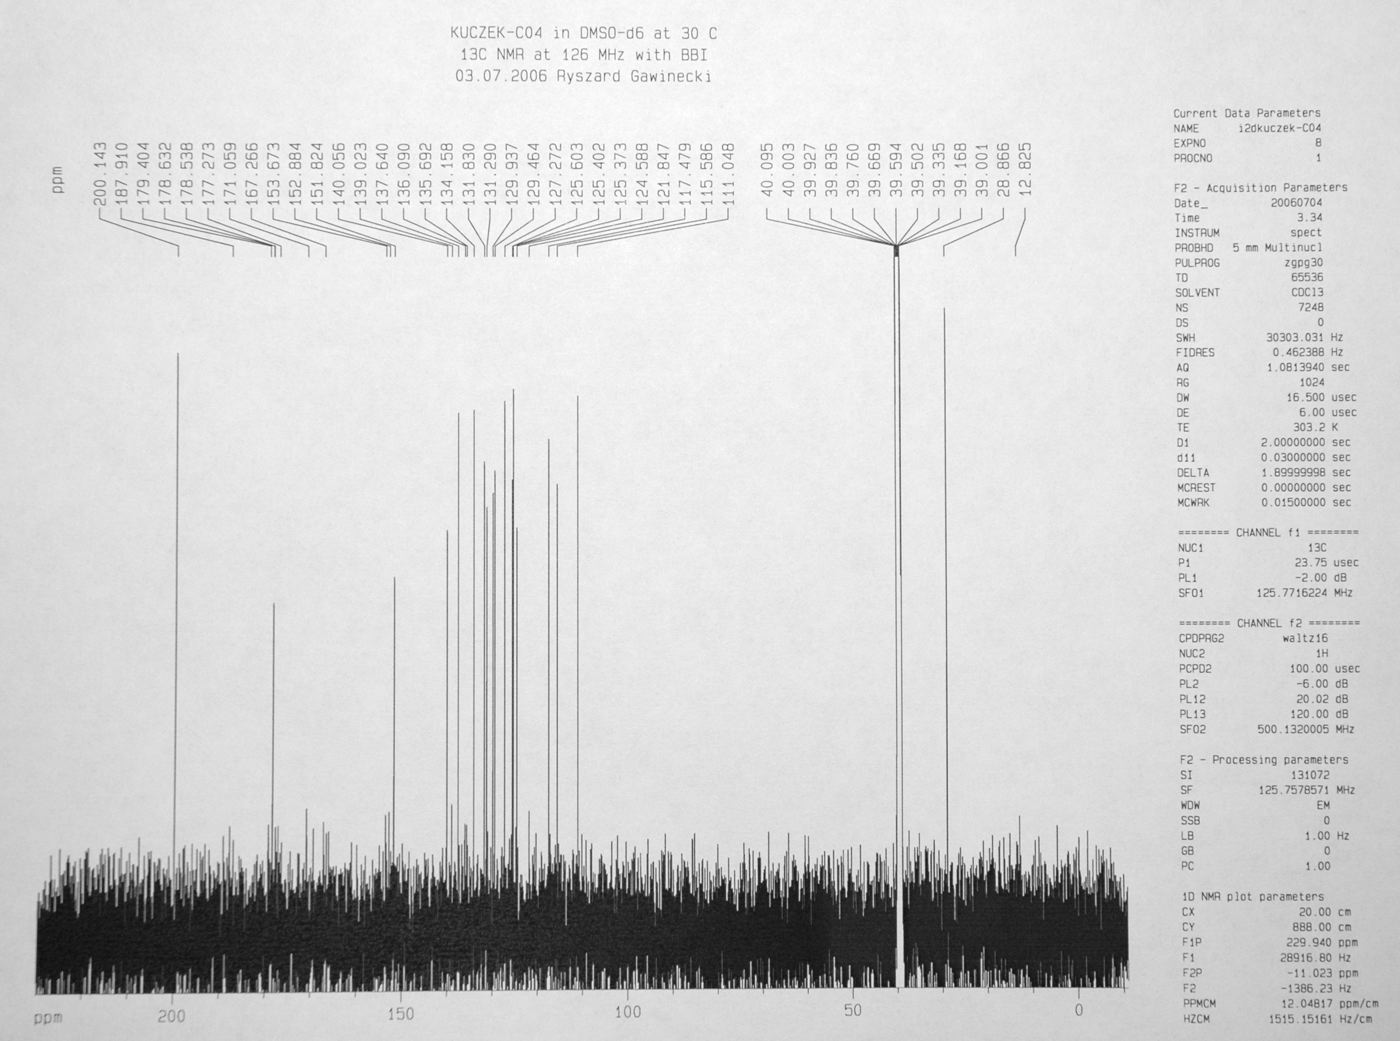


Compound 20


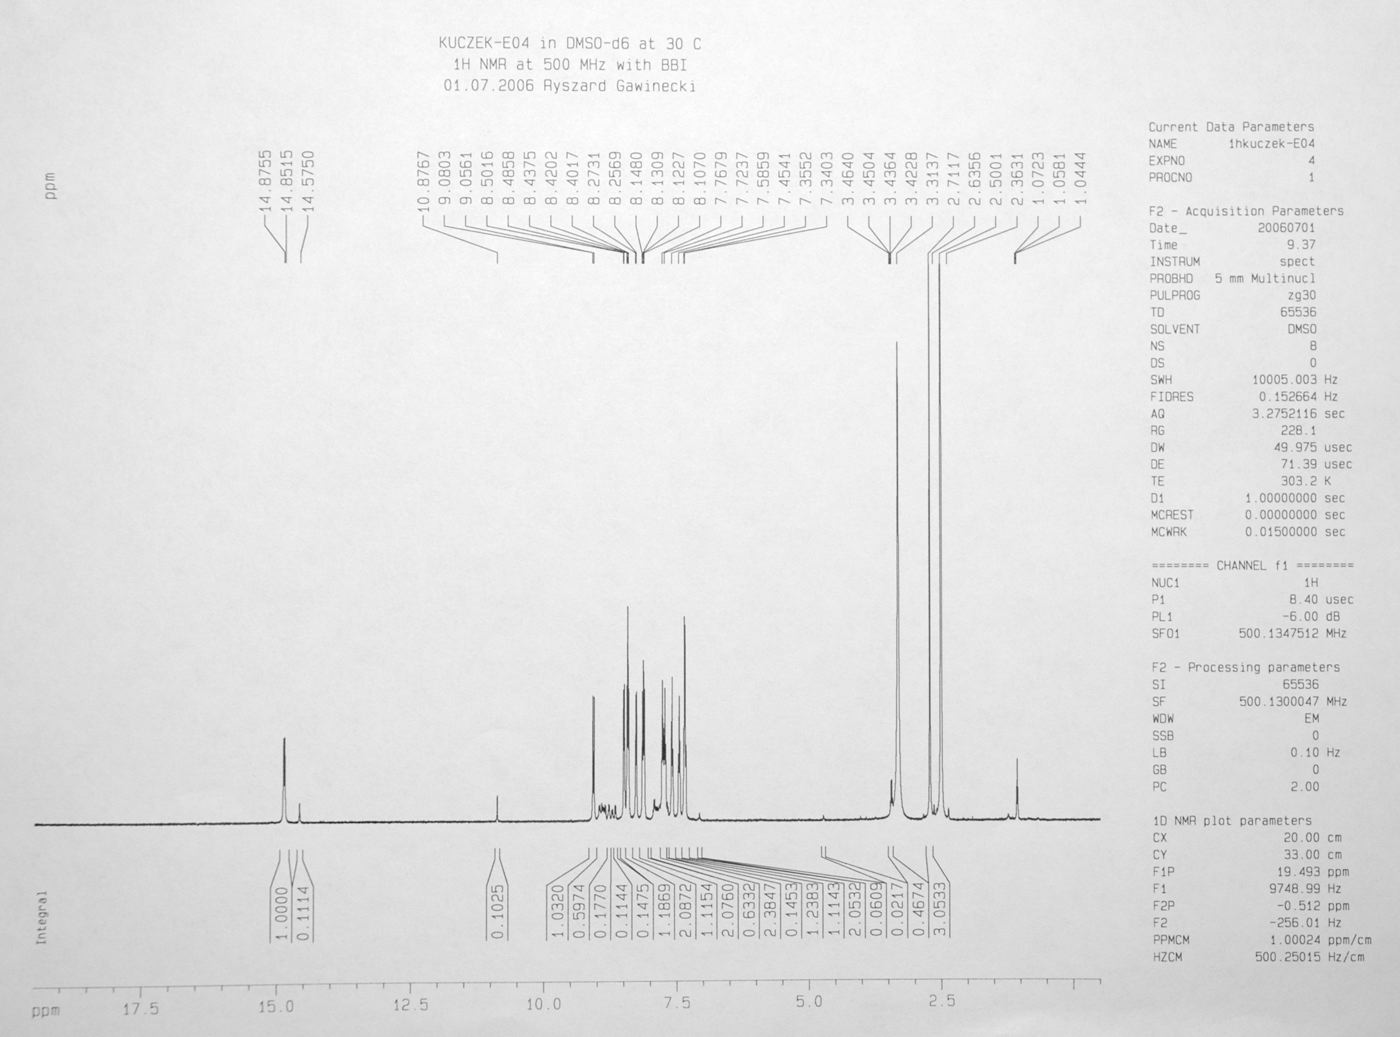


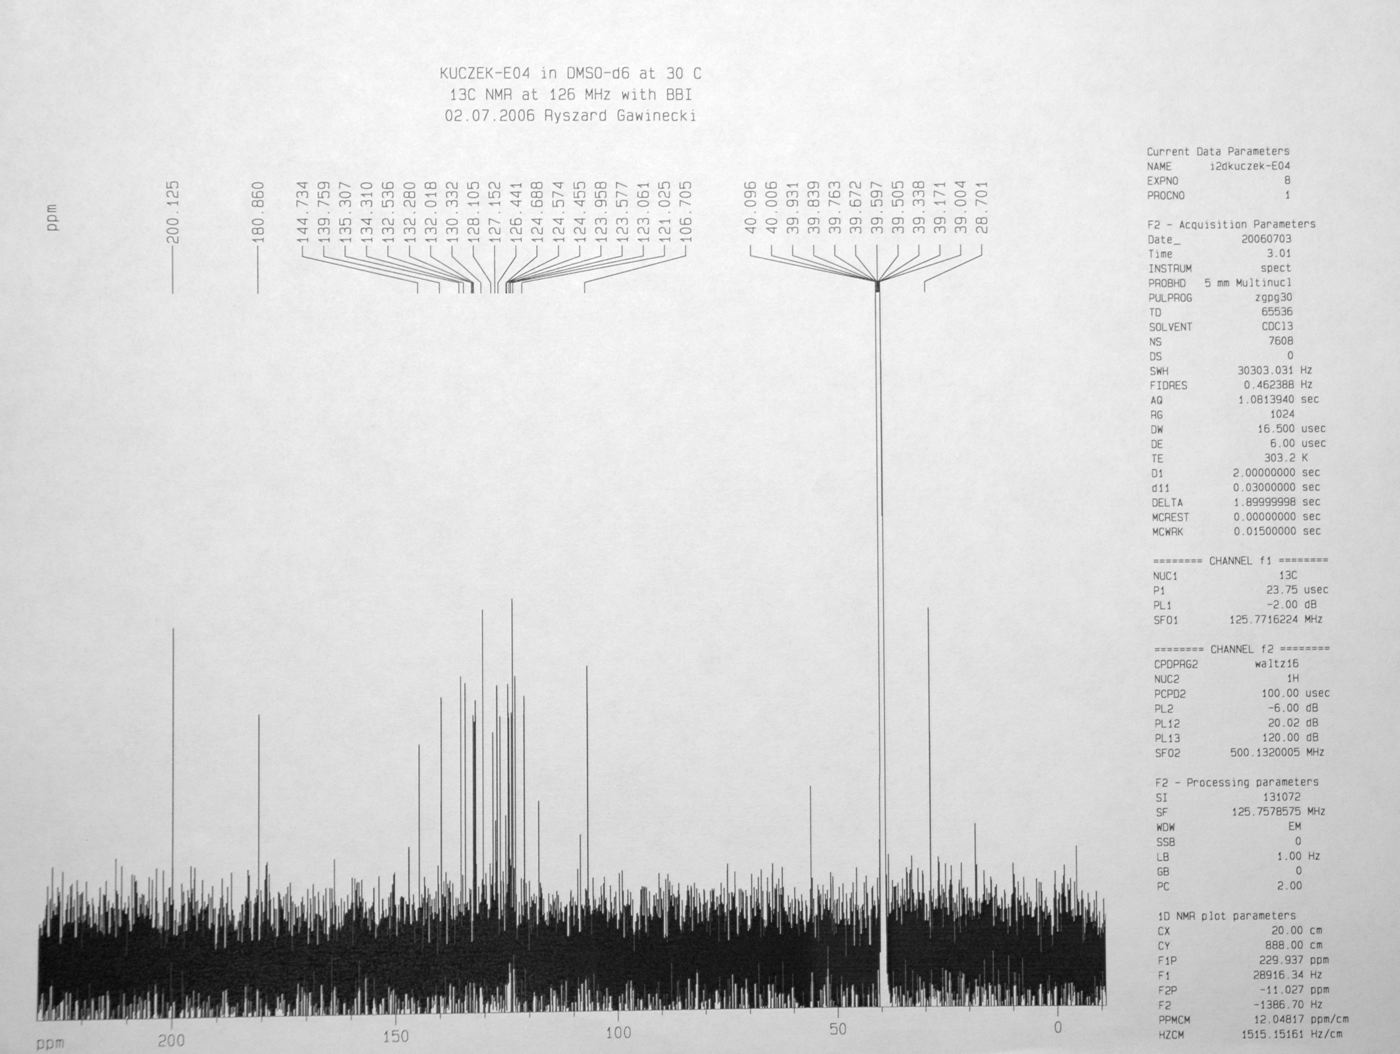

Supplement: Supplementary file 1 [file 4696216]
